# Supplementary material for: Enzymatic Antioxidant Defense and Polymorphic Changes in Male Infertility
Source: MDPI journal article supplement (doi:10.3390/antiox11050817), 2022-04-22
Supplement: s1 [file s1]

Table S1. Statistically significant results of seminological studies, molecular analyzes of the polymorphisms of the genes located on chromosome 5 (IL-4v.C589T (rs2243250), activity of antioxidant enzymes (superoxide dismutase SOD, catalase CAT, glutathione peroxidase GPx, and glutathione reductase GR), concentration chemical elements (Ca, Mg, Na, P, Mn, Fe, Zn, Mo, Li, V, Co, Ag, Ba, Ti, Tl, Sr, Al, Sn, Ni, B, Hg, Cd, As, Be) and the intensity of lipoperoxidation (concentration of malondialdehyde MDA) in healthy controls and men with fertility disorders.

| Survey number | Group     | Seminological study | IL-4 C589T | SOD [U·mL <sup>-1</sup> ] | CAT [nmol·min <sup>-1</sup> ·mL <sup>-1</sup> ] | GPx [nmol·min <sup>-1</sup> ·mL <sup>-1</sup> ] | GR [nmol·min <sup>-1</sup> ·mL <sup>-1</sup> ] | MDA [μM] | Ca [mg·L <sup>-1</sup> ] | Mg [mg·L <sup>-1</sup> ] | Na [mg·L <sup>-1</sup> ] | P [mg·L <sup>-1</sup> ] | Mn [mg·L <sup>-1</sup> ] | Fe [mg·L <sup>-1</sup> ] | Zn [mg·L <sup>-1</sup> ] | Mo [mg·g·L <sup>-1</sup> ] | Li [mg·L <sup>-1</sup> ] | V [mg·L <sup>-1</sup> ] | Co [mg·g·L <sup>-1</sup> ] | Ag [mg·L <sup>-1</sup> ] | Ba [mg·L <sup>-1</sup> ] | Ti [mg·L <sup>-1</sup> ] | Tl [mg·g·L <sup>-1</sup> ] | Sr [mg·L <sup>-1</sup> ] | Al [mg·L <sup>-1</sup> ] | Sn [mg·L <sup>-1</sup> ] | Ni [mg·L <sup>-1</sup> ] | B [mg·L <sup>-1</sup> ] | Hg [mg·g·L <sup>-1</sup> ] | Cd [mg·g·L <sup>-1</sup> ] | As [mg·L <sup>-1</sup> ] | Be [mg·L <sup>-1</sup> ] |  |
|---------------|-----------|---------------------|------------|---------------------------|-------------------------------------------------|-------------------------------------------------|------------------------------------------------|----------|--------------------------|--------------------------|--------------------------|-------------------------|--------------------------|--------------------------|--------------------------|----------------------------|--------------------------|-------------------------|----------------------------|--------------------------|--------------------------|--------------------------|----------------------------|--------------------------|--------------------------|--------------------------|--------------------------|-------------------------|----------------------------|----------------------------|--------------------------|--------------------------|--|
| 4             | Healthy   | normozoospermia     |            |                           |                                                 |                                                 |                                                |          | 57.7                     | 40.2                     | 17.96                    | 34.1                    | 0.027                    | 54.5                     | 10.096                   | 0.01755                    | 0.151                    | 0.004                   | 0.004036                   | 0.001                    | 0.0058                   | 0.0016                   | 0.000261                   | 0.0028                   | 0.953                    | 0.062                    | 0.008                    | 2.438                   | 0.002975                   | 0.000337                   | 0.016                    | 0                        |  |
| 5             | Healthy   | normozoospermia     |            |                           |                                                 |                                                 |                                                |          | 50.1                     | 38.9                     | 16.52                    | 34.7                    | 0.029                    | 52.0                     | 6.753                    | 0.011604                   | 0.184                    | 0.002                   | 0.001234                   | 0                        | 0.0082                   | 0.0027                   | 0.000174                   | 0.0019                   | 1.38                     | 0.051                    | 0.025                    | 2.417                   | 0.002468                   | 0.000388                   | 0.013                    | 0                        |  |
| 6             | Healthy   | normozoospermia     |            |                           |                                                 |                                                 |                                                |          | 51.7                     | 39.4                     | 17.20                    | 35.1                    | 0.026                    | 56.7                     | 10.833                   | 0.010723                   | 0.183                    | 0.003                   | 0.00505                    | 0                        | 0.0062                   | 0.0026                   | 0.00014                    | 0.0011                   | 0.748                    | 0.044                    | 0.019                    | 2.24                    | 0.002887                   | 0.000365                   | 0.002                    | 0                        |  |
| 7             | Healthy   | normozoospermia     |            |                           |                                                 |                                                 |                                                |          |                          |                          |                          |                         |                          |                          |                          |                            |                          |                         |                            |                          |                          |                          |                            |                          |                          |                          |                          |                         |                            |                            |                          |                          |  |
| 8             | Infertile | azoospermia         |            |                           |                                                 |                                                 |                                                |          | 47.6                     | 35.7                     | 15.79                    | 35.4                    | 0.015                    | 54.4                     | 9.905                    | 0.008834                   | 0.178                    | 0.003                   | 0.003444                   | 0                        | 0.0048                   | 0.0017                   | 0.000289                   | 0.0017                   | 0.734                    | 0.035                    | 0.009                    | 2.129                   | 0.00272                    | 0.000276                   | 0.014                    | 0.0047                   |  |
| 9             | Healthy   | normozoospermia     |            |                           |                                                 |                                                 |                                                |          | 54.9                     | 37.9                     | 18.70                    | 34.0                    | 0.023                    | 53.0                     | 9.041                    | 0.011521                   | 0.167                    | 0.003                   | 0.004494                   | 0                        | 0.0072                   | 0.002                    | 0.00027                    | 0.0013                   | 0.858                    | 0.037                    | 0.014                    | 2.389                   | 0.002297                   | 0.00026                    | 0.014                    | 0                        |  |
| 10            | Healthy   | normozoospermia     |            |                           |                                                 |                                                 |                                                |          | 59.5                     | 37.1                     | 19.41                    | 37.5                    | 0.016                    | 54.8                     | 8.836                    | 0.008184                   | 0.154                    | 0.004                   | 0.004009                   | 0                        | 0.0092                   | 0.0023                   | 0.000166                   | 0.0029                   | 1.032                    | 0.036                    | 0.01                     | 2.241                   | 0.003371                   | 0.000737                   | 0.015                    | 0                        |  |
| 11            | Infertile | azoospermia         |            | 0.393                     | 18.1                                            | 8.321                                           | 99.5                                           | 2.454    | 55.7                     | 38.8                     | 18.71                    | 35.7                    | 0.019                    | 56.4                     | 10.392                   | 0.007768                   | 0.195                    | 0.004                   | 0.004453                   | 0                        | 0.0089                   | 0.0039                   | 0.000175                   | 0.0014                   | 0.937                    | 0.034                    | 0.015                    | 2.044                   | 0.002969                   | 0.0001816                  | 0.014                    | 0                        |  |
| 12            | Healthy   | normozoospermia     |            | 0.149                     | 130.402                                         | 5.094                                           | 20.715                                         | 28.357   | 43.7                     | 35.9                     | 16.18                    | 35.4                    | 0.022                    | 56.4                     | 10.232                   | 0.007396                   | 0.175                    | 0.004                   | 0.004073                   | 0                        | 0.0058                   | 0.0028                   | 0.000143                   | 0.0016                   | 0.742                    | 0.034                    | 0.024                    | 1.851                   | 0.002667                   | 0.000475                   | 0.015                    | 0                        |  |
| 13            | Healthy   | normozoospermia     |            | 0.382                     | 39.1                                            | 0                                               | 18.677                                         |          | 47.1                     | 36.7                     | 16.78                    | 33.0                    | 0.018                    | 55.7                     | 8.24                     | 0.007022                   | 0.147                    | 0.003                   | 0.003967                   | 0                        | 0.0099                   | 0.0022                   | 0.000112                   | 0.0012                   | 0.973                    | 0.036                    | 0.01                     | 1.93                    | 0.00345                    | 0.00053                    | 0.015                    | 0                        |  |
| 14            | Healthy   | normozoospermia     |            |                           | 29.061                                          | 0                                               |                                                |          | 55                       | 36.5                     | 17.07                    | 32.7                    | 0.018                    | 55.8                     | 10.557                   | 0.006101                   | 0.217                    | 0.005                   | 0.00049                    | 0                        | 0.0067                   | 0.0023                   | 0.000153                   | 0.0027                   | 0.949                    | 0.055                    | 0.018                    | 2.074                   | 0.001797                   | 0.000262                   | 0.016                    | 0                        |  |
| 15            | Inf       | oligozoo            |            | 0.2                       | 40.56                                           | 1.019                                           | 19.69                                          | 16.      | 55.                      | 40.                      | 17                       | 38                      | 0.0                      | 63                       | 10.                      | 0.0                        | 0.1                      | 0.0                     | 0.0                        | 0                        | 0.0                      | 0.0                      | 0.0                        | 0.0                      | 1.0                      | 0.0                      | 0.0                      | 1.9                     | 0.0                        | 0.0                        | 0.0                      | 0                        |  |

|    |                   |                                    |  |           |             |       |            |                 |          |          |          |         |           |         |           |                  |           |           |                  |   |           |           |                  |           |           |           |           |           |                  |                  |           |                |
|----|-------------------|------------------------------------|--|-----------|-------------|-------|------------|-----------------|----------|----------|----------|---------|-----------|---------|-----------|------------------|-----------|-----------|------------------|---|-----------|-----------|------------------|-----------|-----------|-----------|-----------|-----------|------------------|------------------|-----------|----------------|
|    | erti<br>le        | <b>spermia</b>                     |  | 05        | 6           |       | 6          | 929             | 3        | 7        | 98       | 1       | 19        | 1       | 93<br>9   | 052<br>29        | 88        | 06        | 045<br>63        |   | 85        | 28        | 002<br>08        | 19        | 46        | 59        | 09        | 36        | 025<br>92        | 015<br>95        | 17        |                |
| 16 | He<br>alt<br>hy   | normozo<br>spermi<br>a             |  | 0.0<br>35 | 48.11<br>3  | 0.509 | 21.22<br>4 | 53.<br>857      | 46.<br>4 | 33.<br>5 | 16<br>36 | 34<br>0 | 0.0<br>19 | 52<br>7 | 6.6<br>03 | 0.0<br>057<br>71 | 0.1<br>86 | 0.0<br>03 | 0.0<br>006<br>56 | 0 | 0.0<br>69 | 0.0<br>3  | 0.0<br>000<br>98 | 0.0<br>17 | 1.0<br>79 | 0.0<br>36 | 0.0<br>12 | 1.7<br>72 | 0.0<br>030<br>77 | 0.0<br>003<br>46 | 0.0<br>13 | 0              |
| 17 | He<br>alt<br>hy   | normozo<br>spermi<br>a             |  | 0.1<br>59 | 157.0<br>74 | 2.038 | 18.16<br>8 | 70.<br>5        | 41.<br>4 | 36.<br>5 | 17<br>00 | 34<br>2 | 0.0<br>23 | 59<br>0 | 11.<br>2  | 0.0<br>084<br>75 | 0.1<br>54 | 0.0<br>05 | 0.0<br>009<br>73 | 0 | 0.0<br>64 | 0.0<br>28 | 0.0<br>001<br>98 | 0.0<br>28 | 0.9<br>84 | 0.0<br>65 | 0.0<br>31 | 1.8<br>83 | 0.0<br>026<br>92 | 0.0<br>002<br>41 | 0.0<br>14 | 0              |
| 18 | Inf<br>erti<br>le | <b>asthenoz<br/>oosperm<br/>ia</b> |  | 0.0<br>05 | 40.27<br>2  | 3.056 | 13.58<br>4 | 25.<br>5        | 55.<br>2 | 39.<br>4 | 18<br>39 | 33<br>4 | 0.0<br>18 | 48<br>8 | 8.9<br>19 | 0.0<br>074<br>83 | 0.2<br>11 | 0.0<br>04 | 0.0<br>043<br>73 | 0 | 0.0<br>57 | 0.0<br>27 | 0.0<br>001<br>49 | 0.0<br>29 | 0.9<br>27 | 0.0<br>69 | 0.0<br>1  | 1.7<br>3  | 0.0<br>024<br>48 | 0.0<br>002<br>59 | 0.0<br>14 | 0              |
| 19 | He<br>alt<br>hy   | normozo<br>spermi<br>a             |  | 0.0<br>61 | 49.57<br>8  | 2.547 | 33.45      | 55.<br>5        | 57.<br>5 | 35.<br>8 | 17<br>37 | 35<br>2 | 0.0<br>2  | 56<br>7 | 10.<br>2  | 0.0<br>048<br>08 | 0.1<br>95 | 0.0<br>05 | 0.0<br>043<br>04 | 0 | 0.0<br>68 | 0.0<br>42 | 0.0<br>001<br>52 | 0.0<br>19 | 1.0<br>28 | 0.0<br>54 | 0.0<br>09 | 1.5<br>84 | 0.0<br>028<br>69 | 0.0<br>027<br>7  | 0.0<br>17 | 0              |
| 20 | He<br>alt<br>hy   | normozo<br>spermi<br>a             |  | 0.3<br>38 | 116.2<br>59 | 2.547 | 23.26<br>2 | 118<br>.35<br>7 | 58.<br>5 | 34.<br>4 | 18<br>13 | 33<br>4 | 0.0<br>25 | 50<br>6 | 6.5<br>75 | 0.0<br>067<br>28 | 0.1<br>84 | 0.0<br>04 | 0.0<br>006<br>47 | 0 | 0.0<br>56 | 0.0<br>28 | 0.0<br>001<br>3  | 0.0<br>39 | 0.8<br>38 | 0.0<br>33 | 0.0<br>18 | 1.6<br>3  | 0.0<br>022<br>32 | 0.0<br>003<br>8  | 0.0<br>16 | 0.0<br>03<br>4 |
| 21 | He<br>alt<br>hy   | normozo<br>spermi<br>a             |  | 0.1<br>69 | 20.19<br>5  | 4.075 | 25.80<br>9 | 69.<br>786      | 50.<br>9 | 34.<br>9 | 17<br>54 | 33<br>7 | 0.0<br>18 | 51<br>7 | 10.<br>3  | 0.0<br>042<br>6  | 0.2<br>16 | 0.0<br>05 | 0.0<br>005<br>49 | 0 | 0.0<br>58 | 0.0<br>22 | 0.0<br>001<br>31 | 0.0<br>22 | 0.8<br>8  | 0.0<br>53 | 0.0<br>12 | 1.6<br>07 | 0.0<br>030<br>28 | 0.0<br>005<br>12 | 0.0<br>18 | 0              |
| 22 | He<br>alt<br>hy   | normozo<br>spermi<br>a             |  | 0.3<br>72 | 25.10<br>4  | 0.509 | 18.67<br>7 | 94.<br>071      | 55.<br>1 | 37.<br>2 | 18<br>23 | 34<br>3 | 0.0<br>22 | 54<br>9 | 6.6<br>13 | 0.0<br>038<br>59 | 0.1<br>73 | 0.0<br>04 | 0.0<br>010<br>08 | 0 | 0.0<br>7  | 0.0<br>19 | 0.0<br>000<br>72 | 0.0<br>44 | 1.2<br>27 | 0.0<br>41 | 0.0<br>41 | 1.7<br>88 | 0.0<br>021<br>27 | 0.0<br>003<br>92 | 0.0<br>14 | 0.0<br>01<br>7 |
| 23 | Inf<br>erti<br>le | <b>asthenoz<br/>oosperm<br/>ia</b> |  | 0.1<br>37 | 30.89<br>3  | 5.094 | 12.56<br>5 | 40.<br>5        | 48.<br>6 | 39.<br>3 | 17<br>23 | 36<br>9 | 0.0<br>26 | 53<br>6 | 7.2<br>66 | 0.0<br>045<br>75 | 0.2<br>12 | 0.0<br>04 | 0.0<br>005<br>8  | 0 | 0.0<br>53 | 0.0<br>27 | 0.0<br>001<br>54 | 0.0<br>15 | 0.7<br>75 | 0.0<br>48 | 0.0<br>11 | 1.6<br>38 | 0.0<br>020<br>02 | 0.0<br>002<br>66 | 0.0<br>14 | 0              |
| 24 | He<br>alt<br>hy   | normozo<br>spermi<br>a             |  | 0.4<br>3  | 49.87<br>2  | 0     | 19.69<br>6 | 7.6<br>43       | 53.<br>4 | 36.<br>8 | 18<br>26 | 33<br>3 | 0.0<br>17 | 50<br>0 | 9.3<br>52 | 0.0<br>042<br>37 | 0.1<br>99 | 0.0<br>06 | 0.0<br>006<br>93 | 0 | 0.0<br>66 | 0.0<br>4  | 0.0<br>001<br>18 | 0.0<br>15 | 0.9<br>19 | 0.0<br>51 | 0.0<br>13 | 1.5<br>33 | 0.0<br>020<br>31 | 0.0<br>005<br>48 | 0.0<br>17 | 0              |
| 25 | He<br>alt<br>hy   | normozo<br>spermi<br>a             |  | 0.4<br>88 | 50.97<br>1  | 0.509 | 17.65<br>9 | 5.5             | 60.<br>3 | 37.<br>1 | 18<br>81 | 33<br>4 | 0.0<br>25 | 53<br>1 | 9.3<br>97 | 0.0<br>032<br>07 | 0.1<br>37 | 0.0<br>04 | 0.0<br>047<br>06 | 0 | 0.0<br>6  | 0.0<br>19 | 0.0<br>001<br>63 | 0.0<br>23 | 1.0<br>17 | 0.0<br>7  | 0.0<br>11 | 1.6<br>34 | 0.0<br>018<br>82 | 0.0<br>005<br>51 | 0.0<br>16 | 0              |
| 26 | He<br>alt<br>hy   | normozo<br>spermi<br>a             |  |           |             |       |            |                 | 61.<br>1 | 36.<br>9 | 17<br>48 | 34<br>4 | 0.0<br>21 | 58<br>1 | 11.<br>9  | 0.0<br>045<br>39 | 0.1<br>89 | 0.0<br>06 | 0.0<br>051<br>2  | 0 | 0.0<br>52 | 0.0<br>26 | 0.0<br>001<br>76 | 0.0<br>2  | 1.0<br>26 | 0.0<br>54 | 0.0<br>11 | 1.6<br>73 | 0.0<br>021<br>92 | 0.0<br>006<br>55 | 0.0<br>16 | 0              |
| 27 | He<br>alt<br>hy   | normozo<br>spermi<br>a             |  | 0.0<br>58 | 59.17<br>8  | 1.019 | 18.67<br>7 | 0.2<br>14       | 56.<br>2 | 34.<br>3 | 17<br>46 | 36<br>2 | 0.0<br>23 | 53<br>2 | 9.3<br>66 | 0.0<br>041<br>47 | 0.1<br>94 | 0.0<br>04 | 0.0<br>003<br>24 | 0 | 0.0<br>57 | 0.0<br>73 | 0.0<br>002<br>18 | 0.0<br>17 | 0.8<br>17 | 0.0<br>62 | 0.0<br>08 | 1.7<br>31 | 0.0<br>023<br>47 | 0.0<br>004<br>01 | 0.0<br>13 | 0              |
| 28 | He<br>alt<br>hy   | normozo<br>spermi<br>a             |  | 0.3<br>11 | 41.29<br>8  | 3.566 | 11.03<br>7 | 0.5             | 49.<br>5 | 34       | 16<br>42 | 34<br>0 | 0.0<br>18 | 52<br>8 | 6.1<br>54 | 0.0<br>042<br>52 | 0.1<br>65 | 0.0<br>03 | 0.0<br>002<br>92 | 0 | 0.0<br>71 | 0.0<br>29 | 0.0<br>001<br>62 | 0.0<br>12 | 0.8<br>85 | 0.0<br>49 | 0.0<br>1  | 1.5<br>31 | 0.0<br>017<br>49 | 0.0<br>007<br>03 | 0.0<br>15 | 0              |
| 29 | He                | normozo                            |  | 0.0       | 64.6        | 4.584 | 33.45      | 3.0             | 58.      | 39.      | 18       | 33      | 0.0       | 55      | 7.1       | 0.0              | 0.1       | 0.0       | 0.0              | 0 | 0.0       | 0.0       | 0.0              | 0.0       | 0.7       | 0.0       | 0.0       | 1.5       | 0.0              | 0.0              | 0.0       | 0.0            |

|    |                   |                                   |        |           |            |       |            |            |          |           |          |         |           |         |           |                  |           |           |                  |           |           |           |                  |           |           |           |           |           |                  |                  |           |                |
|----|-------------------|-----------------------------------|--------|-----------|------------|-------|------------|------------|----------|-----------|----------|---------|-----------|---------|-----------|------------------|-----------|-----------|------------------|-----------|-----------|-----------|------------------|-----------|-----------|-----------|-----------|-----------|------------------|------------------|-----------|----------------|
|    | alt<br>hy         | ospermi<br>a                      |        | 3         |            |       |            | 71         | 3        | 6         | 71       | 7       | 23        | 8       | 91        | 033<br>27        | 89        | 04        | 032<br>53        |           | 3         | 29        | 001<br>46        | 21        | 18        | 66        | 09        | 28        | 019<br>15        | 002<br>73        | 11        | 01<br>7        |
| 30 | He<br>alt<br>hy   | normozo<br>ospermi<br>a           | TT     | 0.6       | 14.91<br>9 | 1.019 | 22.75<br>2 | 0.2<br>14  |          | 35.<br>46 | 17<br>45 | 34<br>8 | 0.0<br>18 | 51<br>3 | 6.0<br>2  | 0.0<br>025<br>43 | 0.1<br>58 | 0.0<br>03 | 0.0<br>003<br>24 |           | 0.0<br>49 | 0.0<br>2  | 0.0<br>001<br>31 | 0.0<br>15 | 0.6<br>3  | 0.0<br>33 | 0.0<br>1  | 1.4<br>29 | 0.0<br>018<br>77 | 0.0<br>004<br>87 | 0.0<br>13 | 0              |
| 31 | Inf<br>erti<br>le | <b>Combin<br/>ed</b>              | TT     | 0.2<br>39 | 23.85<br>9 | 0.509 | 19.18<br>7 | 1.2<br>14  | 57.<br>4 | 40.<br>6  | 15<br>85 | 36<br>1 | 0.0<br>22 | 58<br>0 | 8.4<br>03 | 0.0<br>033<br>29 | 0.2<br>08 | 0.0<br>04 | 0.0<br>039<br>43 |           | 0.0<br>61 | 0.0<br>21 | 0.0<br>001<br>01 | 0.0<br>13 | 0.7<br>08 | 0.0<br>67 | 0.0<br>08 | 1.5<br>44 | 0.0<br>020<br>15 | 0.0<br>016<br>69 | 0.0<br>14 | 0              |
| 32 | He<br>alt<br>hy   | normozo<br>ospermi<br>a           |        | 0.3<br>77 | 28.62<br>2 | 0.509 | 21.73<br>4 | 32.<br>643 | 47.<br>3 | 38.<br>4  | 17<br>83 | 34<br>5 | 0.0<br>22 | 55<br>9 | 8.3<br>41 | 0.0<br>021<br>77 | 0.2<br>09 | 0.0<br>04 | 0.0<br>038<br>67 | 0.0<br>02 | 0.0<br>42 | 0.0<br>19 | 0.0<br>001<br>31 | 0.0<br>1  | 0.6<br>42 | 0.0<br>63 | 0.0<br>18 | 1.4<br>81 | 0.0<br>017<br>31 | 0.0<br>001<br>26 | 0.0<br>14 | 0              |
| 34 | Inf<br>erti<br>le | <b>OAT</b>                        |        | 0.5<br>93 | 27.74<br>2 | 0.509 | 19.69<br>6 | 3.3<br>57  |          | 36.<br>49 | 19<br>37 | 31<br>4 | 0.0<br>28 | 52<br>8 | 8.4<br>49 | 0.0<br>042<br>21 | 0.2<br>25 | 0.0<br>04 | 0.0<br>026<br>28 |           | 0.3<br>72 | 0.0<br>28 | 0.0<br>001<br>29 | 0.0<br>32 | 2.0<br>09 | 0.0<br>79 | 0.0<br>14 | 1.6<br>16 | 0.0<br>020<br>23 | 0.0<br>004<br>34 | 0.0<br>14 | 0              |
| 35 | He<br>alt<br>hy   | normozo<br>ospermi<br>a           | TT     | 0.6<br>15 | 66.35<br>9 | 0.509 | 20.71<br>5 |            | 44.<br>5 | 36.<br>1  | 17<br>31 | 34<br>1 | 0.0<br>14 | 52<br>2 | 12.<br>6  | 0.0<br>065<br>64 | 0.2<br>08 | 0.0<br>04 | 0.0<br>005<br>79 |           | 0.6<br>2  | 0.0<br>23 | 0.0<br>000<br>59 | 0.0<br>42 | 0.6<br>18 | 0.0<br>62 | 0.0<br>1  | 1.4<br>74 | 0.0<br>023<br>28 | 0.0<br>002<br>34 | 0.0<br>17 | 0              |
| 36 | Inf<br>erti<br>le | <b>polyzoo<br/>spermia</b>        |        | 0.6<br>6  | 63.79<br>4 | 0.509 | 21.22<br>4 |            | 52.<br>4 |           | 16<br>76 | 30<br>9 | 0.0<br>23 | 53<br>5 | 9.1<br>24 | 0.0<br>038<br>47 | 0.1<br>56 | 0.0<br>03 | 0.0<br>004<br>37 |           | 0.3<br>78 | 0.0<br>27 | 0.0<br>000<br>84 | 0.0<br>24 | 0.6<br>65 | 0.2<br>41 | 0.0<br>11 | 1.5<br>66 | 0.0<br>024<br>02 | 0.0<br>002<br>07 | 0.0<br>13 | 0              |
| 37 | He<br>alt<br>hy   | normozo<br>ospermi<br>a           |        | 0.0<br>73 | 66.21<br>2 | 3.056 | 21.05<br>5 |            | 55.<br>3 | 32.<br>9  | 17<br>45 | 33<br>7 | 0.0<br>15 | 52<br>0 | 9.0<br>15 | 0.0<br>070<br>54 | 0.1<br>83 | 0.0<br>04 | 0.0<br>004<br>51 |           | 0.3<br>41 | 0.0<br>23 | 0.0<br>001<br>72 | 0.0<br>21 | 0.7<br>77 | 0.0<br>64 | 0.0<br>09 | 1.4<br>21 | 0.0<br>019<br>64 | 0.0<br>005<br>21 | 0.0<br>16 | 0              |
| 38 | Inf<br>erti<br>le | <b>asthenoz<br/>osperm<br/>ia</b> | TT     | 0.5<br>65 | 24.22<br>5 | 0     | 19.69<br>6 | 18.<br>357 | 48.<br>6 | 34.<br>4  | 18<br>93 | 33<br>3 | 0.0<br>2  | 48<br>0 | 10.<br>5  | 0.0<br>088<br>94 | 0.2<br>1  | 0.0<br>02 | 0.0<br>003<br>55 |           | 0.4<br>09 | 0.0<br>27 | 0.0<br>001<br>9  | 0.0<br>31 | 0.7<br>73 | 0.0<br>74 | 0.0<br>35 | 1.6<br>27 | 0.0<br>044<br>44 | 0.0<br>002<br>75 | 0.0<br>09 | 0.0<br>01<br>7 |
| 39 | He<br>alt<br>hy   | normozo<br>ospermi<br>a           |        | 0.2<br>05 | 37.12<br>2 | 6.113 | 29.37<br>4 | 3.7<br>86  | 54.<br>9 | 35.<br>5  | 17<br>15 | 33<br>9 | 0.0<br>16 | 53<br>9 | 9.7<br>62 | 0.0<br>088<br>75 | 0.1<br>96 | 0.0<br>02 | 0.0<br>003<br>53 |           | 0.3<br>8  | 0.0<br>43 | 0.0<br>001<br>16 | 0.0<br>28 | 0.9<br>01 | 0.0<br>65 | 0.0<br>18 | 1.3<br>79 | 0.0<br>018<br>91 | 0.0<br>002<br>96 | 0.0<br>09 | 0              |
| 40 | He<br>alt<br>hy   | normozo<br>ospermi<br>a           |        | 0.0<br>88 | 41.29<br>8 | 4.075 | 18.16<br>8 | 2.6<br>43  | 49.<br>5 | 35.<br>7  | 17<br>94 | 33<br>6 | 0.0<br>22 | 56<br>1 | 8.8<br>5  | 0.0<br>055<br>15 | 0.1<br>93 | 0.0<br>04 | 0.0<br>003<br>85 |           | 0.4<br>05 | 0.0<br>32 | 0.0<br>000<br>87 | 0.0<br>28 | 0.6<br>18 | 0.0<br>47 | 0.0<br>1  | 1.4<br>45 | 0.0<br>017<br>66 | 0.0<br>003<br>78 | 0.0<br>11 | 0              |
| 41 | He<br>alt<br>hy   | normozo<br>ospermi<br>a           | C<br>C | 0.4<br>08 | 52.21<br>6 | 1.019 | 23.26<br>2 | 15.<br>5   | 51.<br>9 | 33.<br>8  | 17<br>46 | 34<br>0 | 0.0<br>25 | 54<br>0 | 8.9<br>21 | 0.0<br>058<br>79 | 0.1<br>72 | 0.0<br>03 | 0.0<br>002<br>29 |           | 0.3<br>51 | 0.0<br>35 | 0.0<br>000<br>88 | 0.0<br>27 | 0.7<br>92 | 0.0<br>44 | 0.0<br>08 | 1.3<br>94 | 0.0<br>018<br>06 | 0.0<br>002<br>34 | 0.0<br>12 | 0.0<br>01<br>7 |
| 42 | He<br>alt<br>hy   | normozo<br>ospermi<br>a           |        | 0.4<br>3  | 23.93<br>2 | 0.509 | 12.90<br>4 | 19.<br>571 | 40.<br>6 |           | 16<br>66 | 32<br>3 | 0.0<br>17 | 49<br>2 | 8.7<br>29 | 0.0<br>050<br>04 |           | 0.0<br>02 | 0.0<br>017<br>46 |           | 0.3<br>5  | 0.0<br>14 | 0.0<br>001<br>45 | 0.0<br>23 | 0.8<br>36 | 0.0<br>37 | 0.0<br>36 | 1.4<br>17 | 0.0<br>024<br>75 | 0.0<br>002<br>94 | 0.0<br>17 | 0              |
| 43 | He<br>alt<br>hy   | normozo<br>ospermi<br>a           | C<br>C | 0.2<br>97 | 39.68<br>6 | 0     | 11.88<br>6 |            | 43.<br>8 | 41.<br>3  | 16<br>67 | 35<br>0 | 0.0<br>24 | 54<br>1 | 8.3<br>19 | 0.0<br>042<br>78 | 0.2<br>15 | 0.0<br>03 | 0.0<br>003<br>99 |           | 0.2<br>79 | 0.0<br>19 | 0.0<br>000<br>83 | 0.0<br>21 | 0.6<br>69 | 0.0<br>36 | 0.0<br>11 | 1.3<br>49 | 0.0<br>026<br>62 | 0.0<br>002<br>98 | 0.0<br>12 | 0              |
| 44 | Inf               | <b>Combin</b>                     | C      | 0.6       | 176.9      | 1.019 | 15.62      | 209        | 47       | 30.       | 17       | 29      | 0.0       | 47      | 10.       | 0.0              | 0.2       | 0.0       | 0.0              | 0         | 0.3       | 0.0       | 0.0              | 0.0       | 0.6       | 0.0       | 0.0       | 1.3       | 0.0              | 0.0              | 0.0       | 0              |

|    |                   |                           |    |           |            |       |            |                 |           |          |          |          |           |          |                |                  |           |           |                  |           |           |           |                  |           |           |           |           |           |                  |                  |           |                |
|----|-------------------|---------------------------|----|-----------|------------|-------|------------|-----------------|-----------|----------|----------|----------|-----------|----------|----------------|------------------|-----------|-----------|------------------|-----------|-----------|-----------|------------------|-----------|-----------|-----------|-----------|-----------|------------------|------------------|-----------|----------------|
|    | erti<br>le        | ed                        | C  | 68        | 32         |       | 1          | .78<br>6        |           | 4        | 88       | 0        | 18        | 9        | 41<br>2        | 059<br>75        | 01        | 03        | 026<br>66        |           | 1         | 2         | 001<br>64        | 22        | 46        | 37        | 12        | 44        | 020<br>81        | 005<br>78        | 13        |                |
| 45 | He<br>alt<br>hy   | normozo<br>spermi<br>a    | TT | 0.0<br>02 | 82.18<br>6 | 9.678 | 31.92<br>1 | 3.7<br>86       | 54.<br>7  | 32.<br>5 | 17<br>28 | 31<br>8  | 0.0<br>16 | 50<br>9  | 8.3<br>05      | 0.0<br>050<br>72 | 0.2<br>21 | 0.0<br>04 | 0.0<br>003<br>75 | 0         | 0.3<br>04 | 0.0<br>22 | 0.0<br>000<br>46 | 0.0<br>18 | 0.6<br>3  | 0.0<br>38 | 0.0<br>07 | 1.2<br>02 | 0.0<br>017<br>92 | 0.0<br>001<br>55 | 0.0<br>12 | 0              |
| 46 | He<br>alt<br>hy   | normozo<br>spermi<br>a    | TT | 1.2<br>42 | 27.15<br>6 | 1.019 | 14.09<br>3 | 12.<br>357      | 31.<br>48 | 16<br>7  | 30<br>27 | 0.0<br>9 | 51<br>24  | 8.4<br>8 | 0.0<br>62      | 0.0<br>030<br>09 | 0.2<br>03 | 0.0<br>04 | 0.0<br>004<br>12 | 0         | 0.3<br>32 | 0.0<br>18 | 0.0<br>001<br>08 | 0.0<br>45 | 0.7<br>14 | 0.0<br>42 | 0.1<br>52 | 1.1<br>94 | 0.0<br>033<br>44 | 0.0<br>002<br>65 | 0.0<br>13 | 0.0<br>01<br>8 |
| 47 | Inf<br>erti<br>le | oligozoo<br>spermia       |    | 0.1<br>36 | 40.85<br>9 | 1.019 | 14.94<br>2 | 0.9<br>29       | 58.<br>6  | 36<br>36 | 18<br>50 | 35<br>2  | 0.0<br>15 | 48<br>7  | 7.9<br>77      | 0.0<br>046<br>62 | 0.1<br>96 | 0.0<br>04 | 0.0<br>004<br>7  | 0         | 0.3<br>23 | 0.0<br>32 | 0.0<br>001<br>22 | 0.0<br>27 | 0.6<br>76 | 0.0<br>39 | 0.0<br>22 | 1.2<br>67 | 0.0<br>016<br>77 | 0.0<br>003<br>3  | 0.0<br>12 | 0              |
| 48 | He<br>alt<br>hy   | normozo<br>spermi<br>a    | TT | 0.1<br>03 | 49.43<br>2 | 0.509 | 25.29<br>9 | 124<br>.78<br>6 | 51.<br>4  | 37.<br>1 | 16<br>71 | 38<br>0  | 0.0<br>25 | 54<br>3  | 8.8<br>98      | 0.0<br>041<br>72 | 0.1<br>65 | 0.0<br>03 | 0.0<br>018<br>75 | 0.0<br>01 | 0.2<br>95 | 0.0<br>23 | 0.0<br>001<br>95 | 0.0<br>22 | 0.5<br>85 | 0.0<br>39 | 0.0<br>14 | 1.2<br>79 | 0.0<br>016<br>63 | 0.0<br>003<br>49 | 0.0<br>12 | 0.0<br>01<br>8 |
| 49 | Inf<br>erti<br>le | OAT                       | TT | 0.4<br>25 | 37.19<br>5 | 2.038 | 17.14<br>9 | 6.2<br>14       | 36.<br>46 | 17<br>1  | 34<br>67 | 0.0<br>2 | 50<br>19  | 9.2<br>2 | 0.0<br>08      | 0.0<br>043<br>91 | 0.1<br>82 | 0.0<br>04 | 0.0<br>004<br>55 | 0         | 0.3<br>5  | 0.0<br>25 | 0.0<br>001<br>25 | 0.0<br>5  | 0.6<br>68 | 0.0<br>55 | 0.0<br>07 | 1.1<br>87 | 0.0<br>035<br>71 | 0.0<br>003<br>27 | 0.0<br>13 | 0              |
| 50 | He<br>alt<br>hy   | normozo<br>spermi<br>a    | TT | 0.5<br>52 | 22.75<br>9 | 1.528 | 14.09<br>3 | 1.6<br>43       | 58.<br>2  | 38.<br>3 | 17<br>62 | 35<br>3  | 0.0<br>24 | 54<br>8  | 9.6<br>81      | 0.0<br>031<br>91 | 0.1<br>82 | 0.0<br>05 | 0.0<br>011<br>65 | 0         | 0.3<br>33 | 0.0<br>2  | 0.0<br>002<br>08 | 0.0<br>3  | 0.7<br>14 | 0.0<br>38 | 0.0<br>37 | 1.2<br>75 | 0.0<br>018<br>1  | 0.0<br>004<br>35 | 0.0<br>15 | 0              |
| 51 | He<br>alt<br>hy   | normozo<br>spermi<br>a    | TT | 0.5<br>79 | 55.14<br>7 | 0.509 | 15.62<br>1 | 94.<br>786      | 51.<br>5  | 39.<br>9 | 18<br>19 | 36<br>3  | 0.0<br>2  | 55<br>5  | 9.2<br>35      | 0.0<br>033<br>86 | 0.2<br>18 | 0.0<br>02 | 0.0<br>024<br>9  | 0         | 0.3<br>06 | 0.0<br>25 | 0.0<br>000<br>63 | 0.0<br>25 | 0.8<br>06 | 0.0<br>38 | 0.0<br>24 | 1.2<br>81 | 0.0<br>017<br>54 | 0.0<br>002<br>29 | 0.0<br>13 | 0              |
| 52 | He<br>alt<br>hy   | normozo<br>spermi<br>a    | TT | 0.5<br>45 | 36.60<br>9 | 0     | 16.64      | 6.6<br>43       | 43.<br>1  | 35.<br>3 | 16<br>15 | 33<br>3  | 0.0<br>14 | 57<br>0  | 9.2<br>07      | 0.0<br>035<br>3  | 0.1<br>88 | 0.0<br>04 | 0.0<br>022<br>2  | 0         | 0.3<br>1  | 0.0<br>88 | 0.0<br>000<br>59 | 0.0<br>14 | 0.5<br>51 | 0.0<br>41 | 0.0<br>1  | 1.2<br>9  | 0.0<br>016<br>97 | 0.0<br>004<br>11 | 0.0<br>14 | 0              |
| 53 | He<br>alt<br>hy   | normozo<br>spermi<br>a    |    | 0.4<br>36 | 32.57<br>8 | 2.038 | 22.75<br>2 | 4.0<br>71       | 62.<br>6  | 36<br>36 | 17<br>03 | 36<br>9  | 0.0<br>15 | 54<br>8  | 7.7<br>63      | 0.0<br>032<br>19 | 0.2<br>34 | 0.0<br>05 | 0.0<br>002<br>67 | 0         | 0.3<br>58 | 0.0<br>22 | 0.0<br>001<br>04 | 0.0<br>24 | 0.7<br>51 | 0.0<br>57 | 0.0<br>19 | 1.2<br>37 | 0.0<br>019<br>96 | 0.0<br>003<br>03 | 0.0<br>16 | 0              |
| 54 | He<br>alt<br>hy   | normozo<br>spermi<br>a    | TT | 0.2<br>84 | 34.77<br>7 | 1.528 | 31.92<br>1 | 30.<br>5        | 53.<br>7  | 32.<br>6 | 19<br>79 | 32<br>4  | 0.0<br>17 | 49<br>7  | 8.5            | 0.0<br>056<br>17 | 0.1<br>95 | 0.0<br>06 | 0.0<br>005<br>42 | 0         | 0.3<br>46 | 0.0<br>21 | 0.0<br>000<br>3  | 0.0<br>54 | 0.6<br>02 | 0.0<br>57 | 0.0<br>69 | 1.2<br>39 | 0.0<br>015<br>04 | 0.0<br>004<br>62 | 0.0<br>16 | 0              |
| 55 | He<br>alt<br>hy   | normozo<br>spermi<br>a    | TT | 0.3<br>48 | 52.58<br>3 | 1.528 | 16.13      | 1.2<br>14       | 53.<br>6  | 41       | 19<br>39 | 37<br>8  | 0.0<br>18 | 61<br>5  | 8.3<br>26      | 0.0<br>040<br>68 | 0.1<br>96 | 0.0<br>05 | 0.0<br>023       | 0         | 0.3<br>7  | 0.0<br>18 | 0.0<br>000<br>33 | 0.0<br>22 | 0.6<br>62 | 0.0<br>63 | 0.0<br>11 | 1.1<br>81 | 0.0<br>014<br>22 | 0.0<br>002<br>3  | 0.0<br>17 | 0              |
| 56 | Inf<br>erti<br>le | Combin<br>ed              |    | 0.0<br>69 | 51.77<br>7 | 3.566 | 24.28<br>1 | 1.2<br>14       | 58.<br>2  | 37.<br>4 | 16<br>35 | 35<br>8  | 0.0<br>19 | 54<br>3  | 11.<br>97<br>5 | 0.0<br>040<br>59 | 0.1<br>7  | 0.0<br>05 | 0.0<br>042<br>77 | 0         | 0.3<br>68 | 0.0<br>32 | 0.0<br>000<br>73 | 0.0<br>39 | 0.6<br>42 | 0.0<br>57 | 0.0<br>08 | 1.1<br>64 | 0.0<br>031<br>59 | 0.0<br>003<br>6  | 0.0<br>17 | 0              |
| 58 | Inf<br>erti<br>le | asthenoz<br>oosperm<br>ia |    | 0.8<br>36 | 59.69<br>1 | 2.038 | 17.14<br>9 | 5.9<br>29       | 33.<br>54 | 18<br>3  | 31<br>60 | 0.1<br>7 | 51<br>18  | 9        | 11.<br>20<br>9 | 0.0<br>382<br>31 | 0.1<br>68 | 0.0<br>07 | 0.0<br>133<br>02 | 0         | 0.4<br>03 | 0.0<br>27 | 0.0<br>001<br>06 | 0.0<br>21 | 0.7<br>02 | 0.0<br>55 | 0.3<br>55 | 1.2       | 0.0<br>015<br>98 | 0.0<br>003<br>94 | 0.0<br>16 | 0              |
| 59 | He                | normozo                   | TT | 0.5       | 39.68      | 0.509 | 18.16      | 5.9             | 42.       | 34.      | 18       | 32       | 0.0       | 56       | 8.9            | 0.0              | 0.1       | 0.0       | 0.0              | 0         | 0.2       | 0.0       | 0.0              | 0.0       | 0.6       | 0.0       | 0.0       | 1.2       | 0.0              | 0.0              | 0.0       | 0              |

|    |                   |                                   |        |           |             |            |            |            |          |          |          |         |           |         |                |                  |           |           |                  |   |           |           |                  |           |           |           |           |           |                  |                  |           |                |
|----|-------------------|-----------------------------------|--------|-----------|-------------|------------|------------|------------|----------|----------|----------|---------|-----------|---------|----------------|------------------|-----------|-----------|------------------|---|-----------|-----------|------------------|-----------|-----------|-----------|-----------|-----------|------------------|------------------|-----------|----------------|
|    | alt<br>hy         | ospermi<br>a                      |        | 59        | 6           |            | 8          | 29         | 4        | 6        | 24       | 8       | 2         | 7       | 5              | 067<br>35        | 98        | 03        | 019<br>05        |   | 96        | 26        | 000<br>72        | 16        | 6         | 62        | 07        | 27        | 022<br>9         | 002<br>53        | 1         |                |
| 60 | He<br>alt<br>hy   | normozo<br>ospermi<br>a           | C<br>C | 0.2<br>84 | 113.9<br>88 | 0          | 2.377      |            | 56       | 36.<br>4 | 18<br>60 | 33<br>0 | 0.0<br>18 | 52<br>9 | 10.<br>47<br>1 | 0.0<br>073<br>12 | 0.1<br>75 | 0.0<br>04 | 0.0<br>003<br>22 |   | 0.4<br>17 | 0.0<br>15 | 0.0<br>001<br>33 | 0.0<br>24 | 0.7<br>32 | 0.0<br>67 | 0.0<br>09 | 1.2<br>96 | 0.0<br>020<br>98 | 0.0<br>002<br>99 | 0.0<br>14 | 0              |
| 61 | Inf<br>erti<br>le | <b>asthenoz<br/>osperm<br/>ia</b> | TT     | 0.3<br>93 | 36.46<br>2  | 2.038      | 23.77<br>1 | 9.7<br>86  | 46       | 37.<br>1 | 17<br>33 | 36<br>0 | 0.0<br>18 | 54<br>5 | 8.6<br>99      | 0.0<br>045<br>12 | 0.2<br>28 | 0.0<br>03 | 0.0<br>024<br>01 |   | 0.2<br>99 | 0.0<br>31 | 0.0<br>001<br>01 | 0.0<br>28 | 0.5<br>86 | 0.0<br>59 | 0.0<br>08 | 1.2<br>88 | 0.0<br>018<br>69 | 0.0<br>003<br>29 | 0.0<br>1  | 0              |
| 62 | He<br>alt<br>hy   | normozo<br>ospermi<br>a           | TT     | 0.0<br>93 | 86.87<br>6  | 1.019      | 23.77<br>1 | 0.5        | 48.<br>8 | 39.<br>5 | 15<br>59 | 38<br>8 | 0.0<br>19 | 61<br>4 | 9.7<br>24      | 0.0<br>048<br>33 | 0.1<br>91 | 0.0<br>04 | 0.0<br>004<br>3  |   | 0.2<br>92 | 0.0<br>28 | 0.0<br>001<br>64 | 0.0<br>31 | 0.6<br>15 | 0.0<br>6  | 0.0<br>09 | 1.1<br>99 | 0.0<br>025<br>11 | 0.0<br>010<br>62 | 0.0<br>12 | 0              |
| 63 | He<br>alt<br>hy   | normozo<br>ospermi<br>a           |        | 0.7<br>52 | 40.27<br>2  | 0.509      | 20.20<br>6 | 5.5        | 51.<br>4 | 39.<br>5 | 19<br>08 | 36<br>9 | 0.0<br>18 | 54<br>0 | 8.8<br>86      | 0.0<br>046<br>8  | 0.2<br>23 | 0.0<br>05 | 0.0<br>016<br>66 |   | 0.3<br>77 | 0.0<br>23 | 0.0<br>001<br>82 | 0.0<br>33 | 0.6<br>34 | 0.0<br>61 | 0.0<br>07 | 1.2<br>36 | 0.0<br>020<br>92 | 0.0<br>007<br>07 | 0.0<br>13 | 0.0<br>01<br>9 |
| 64 | Inf<br>erti<br>le | <b>OAT</b>                        | TT     | 0.5       | 142.4<br>92 | 1.528      | 23.77<br>1 | 3.3<br>57  | 58.<br>4 | 41.<br>7 | 17<br>70 | 37<br>5 | 0.0<br>16 | 56<br>9 | 8.5<br>66      | 0.0<br>030<br>91 | 0.2<br>1  | 0.0<br>03 | 0.0<br>020<br>23 |   | 0.3<br>05 | 0.0<br>4  | 0.0<br>000<br>43 | 0.0<br>16 | 0.8<br>34 | 0.0<br>47 | 0.0<br>09 | 1.2<br>78 | 0.0<br>018<br>24 | 0.0<br>001<br>88 | 0.0<br>1  | 0              |
| 65 | Inf<br>erti<br>le | <b>OAT</b>                        | TT     | 0.6<br>6  | 30.01<br>4  | 0          | 19.18<br>7 | 3.7<br>86  | 48.<br>4 | 32.<br>8 | 17<br>66 | 31<br>0 | 0.0<br>2  | 49<br>6 | 9.6<br>8       | 0.0<br>045<br>56 | 0.1<br>95 | 0.0<br>04 | 0.0<br>004<br>23 |   | 0.3<br>54 | 0.0<br>19 | 0.0<br>001<br>19 | 0.1<br>06 | 0.8<br>21 | 0.0<br>47 | 0.0<br>09 | 1.2<br>03 | 0.0<br>018<br>37 | 0.0<br>005<br>39 | 0.0<br>15 | 0              |
| 66 | Inf<br>erti<br>le | <b>asthenoz<br/>osperm<br/>ia</b> | TT     | 1.1<br>12 | 144.6<br>91 | 1.019      | 18.67<br>7 | 1.6<br>43  | 50       | 30.<br>8 | 17<br>62 | 34<br>4 | 0.0<br>16 | 52<br>6 | 8.7<br>28      | 0.0<br>041<br>54 | 0.1<br>7  | 0.0<br>04 | 0.0<br>005<br>32 |   | 0.4<br>05 | 0.0<br>38 | 0.0<br>000<br>9  | 0.0<br>24 | 0.7<br>21 | 0.0<br>44 | 0.0<br>1  | 1.1<br>54 | 0.0<br>049<br>62 | 0.0<br>004<br>36 | 0.0<br>13 | 0              |
| 67 | Inf<br>erti<br>le | <b>polyzoo<br/>spermia</b>        | TT     | 0.5<br>45 | 76.76<br>4  | 3.056      | 21.73<br>4 | 0.2<br>14  | 49.<br>2 | 33.<br>4 | 16<br>70 | 35<br>0 | 0.0<br>18 | 56<br>1 | 9.0<br>73      | 0.0<br>043<br>07 | 0.2<br>26 | 0.0<br>04 | 0.0<br>029<br>67 |   | 0.3<br>33 | 0.0<br>35 | 0.0<br>000<br>89 | 0.0<br>35 | 0.7<br>49 | 0.0<br>45 | 0.0<br>09 | 1.1<br>95 | 0.0<br>025<br>59 | 0.0<br>004<br>97 | 0.0<br>15 | 0              |
| 68 | He<br>alt<br>hy   | normozo<br>ospermi<br>a           | TT     | 0.3<br>77 | 52.14<br>3  | 1.528      | 19.18<br>7 | 6.6<br>43  | 54.<br>7 | 38.<br>3 | 19<br>64 | 37<br>0 | 0.0<br>29 | 54<br>4 | 11.<br>19<br>4 | 0.0<br>111<br>58 | 0.1<br>85 | 0.0<br>05 | 0.0<br>037<br>68 |   | 0.4<br>18 | 0.0<br>29 | 0.0<br>001<br>5  | 0.1<br>31 | 0.8<br>08 | 0.0<br>6  | 0.0<br>12 | 1.2<br>4  | 0.0<br>023<br>77 | 0.0<br>004<br>54 | 0.0<br>15 | 0              |
| 69 | Inf<br>erti<br>le | <b>azoosper<br/>mia</b>           |        | 0.0<br>1  | 74.85<br>9  | 21.90<br>3 | 3.396      | 13.<br>357 |          |          |          |         |           |         |                |                  |           |           |                  |   |           |           |                  |           |           |           |           |           |                  |                  |           |                |
| 70 | He<br>alt<br>hy   | normozo<br>ospermi<br>a           |        | 0.0<br>55 | 29.79<br>4  | 2.038      | 20.20<br>6 | 33.<br>357 | 55.<br>3 | 35.<br>9 | 18<br>59 | 35<br>7 | 0.0<br>19 | 52<br>1 | 7.8<br>16      | 0.0<br>028<br>29 | 0.1<br>72 | 0.0<br>02 | 0.0<br>021<br>76 |   | 0.0<br>72 | 0.0<br>88 | 0.0<br>000<br>3  | 0.0<br>33 | 0.6<br>91 | 0.0<br>57 | 0.0<br>1  | 1.2<br>96 | 0.0<br>013<br>94 | 0.0<br>002<br>14 | 0.0<br>13 | 0              |
| 71 | He<br>alt<br>hy   | normozo<br>ospermi<br>a           | TT     | 0.5<br>79 | 48.04       | 0.509      | 17.14<br>9 | 7.3<br>57  | 56.<br>9 | 37.<br>4 | 18<br>12 | 35<br>1 | 0.0<br>13 | 52<br>9 | 8.6<br>66      | 0.0<br>042<br>26 | 0.1<br>92 | 0.0<br>05 | 0.0<br>004<br>13 |   | 0.3<br>07 | 0.0<br>21 | 0.0<br>001<br>87 | 0.0<br>3  | 0.7<br>17 | 0.0<br>56 | 0.0<br>08 | 1.1<br>93 | 0.0<br>017<br>41 | 0.0<br>003<br>74 | 0.0<br>13 | 0              |
| 72 | Inf<br>erti<br>le | <b>OAT</b>                        | TT     | 0.3<br>11 | 38.80<br>7  | 0          | 27.84<br>6 | 6.9<br>29  | 41.<br>5 | 37.<br>4 | 18<br>10 | 36<br>3 | 0.0<br>18 | 60<br>2 | 9.6<br>09      | 0.0<br>051<br>2  | 0.1<br>97 | 0.0<br>05 | 0.0<br>006<br>73 |   | 0.2<br>75 | 0.0<br>24 | 0.0<br>001       | 0.0<br>19 | 0.5<br>05 | 0.0<br>56 | 0.0<br>1  | 1.1<br>17 | 0.0<br>014<br>27 | 0.0<br>004<br>2  | 0.0<br>13 | 0              |
| 73 | He                | normozo                           | TT     | 0.8       | 45.91       | 1.019      | 22.75      | 0.5        | 55.      | 39.      | 17       | 35      | 0.0       | 56      | 9.8            | 0.0              | 0.2       | 0.0       | 0.0              | 0 | 0.3       | 0.0       | 0.0              | 0.0       | 0.4       | 0.0       | 0.0       | 1.2       | 0.0              | 0.0              | 0.0       | 0.0            |

|    |                   |                          |        |           |            |       |            |                 |          |          |          |         |           |         |           |                  |           |           |                  |  |           |           |                  |           |           |           |           |           |                  |                  |           |                |
|----|-------------------|--------------------------|--------|-----------|------------|-------|------------|-----------------|----------|----------|----------|---------|-----------|---------|-----------|------------------|-----------|-----------|------------------|--|-----------|-----------|------------------|-----------|-----------|-----------|-----------|-----------|------------------|------------------|-----------|----------------|
|    | alt<br>hy         | ospermi<br>a             |        | 76        | 5          |       | 2          |                 | 9        | 2        | 36       | 5       | 16        | 9       | 2         | 045              | 28        | 04        | 004<br>43        |  | 5         | 95        | 001<br>02        | 39        | 64        | 64        | 09        | 19        | 039<br>35        | 010<br>54        | 12        | 03<br>4        |
| 74 | He<br>alt<br>hy   | normozo<br>ospermi<br>a  |        | 0.2<br>51 | 13.52<br>7 | 2.038 | 25.29<br>9 | 7.6<br>43       | 60.<br>8 | 34.<br>2 | 17<br>32 | 32<br>5 | 0.0<br>15 | 53<br>1 | 9.5<br>4  | 0.0<br>040<br>89 | 0.1<br>94 | 0.0<br>05 | 0.0<br>023<br>43 |  | 0.3<br>35 | 0.0<br>23 | 0.0<br>001<br>15 | 0.0<br>31 | 0.5<br>36 | 0.0<br>6  | 0.0<br>11 | 1.1<br>36 | 0.0<br>022<br>68 | 0.0<br>004<br>62 | 0.0<br>11 | 0              |
| 75 | He<br>alt<br>hy   | normozo<br>ospermi<br>a  | C<br>C | 0.3<br>24 | 45.98<br>8 | 1.019 | 10.86<br>7 | 5.5<br>5        | 53.<br>9 | 28.<br>8 | 17<br>24 | 31<br>1 | 0.0<br>12 | 48<br>5 | 8.7<br>66 | 0.0<br>031<br>65 | 0.1<br>57 | 0.0<br>03 | 0.0<br>005<br>57 |  | 0.2<br>91 | 0.0<br>29 | 0.0<br>000<br>68 | 0.0<br>16 | 0.4<br>86 | 0.0<br>51 | 0.0<br>12 | 1.1<br>53 | 0.0<br>014<br>64 | 0.0<br>002<br>19 | 0.0<br>11 | 0              |
| 76 | He<br>alt<br>hy   | normozo<br>ospermi<br>a  | TT     | 0.2<br>27 | 27.22<br>9 | 1.019 | 18.67<br>7 | 5.2<br>14       | 54.<br>2 | 41.<br>2 | 17<br>85 | 38<br>4 | 0.0<br>16 | 62<br>1 | 10.<br>7  | 0.0<br>041<br>15 | 0.1<br>61 | 0.0<br>04 | 0.0<br>001<br>61 |  | 0.3<br>4  | 0.0<br>13 | 0.0<br>002<br>06 | 0.0<br>26 | 0.6<br>6  | 0.0<br>61 | 0.0<br>09 | 1.1<br>75 | 0.0<br>016<br>21 | 0.0<br>004<br>85 | 0.0<br>11 | 0              |
| 77 | He<br>alt<br>hy   | normozo<br>ospermi<br>a  |        | 0.0<br>17 | 69.14<br>3 | 3.566 | 19.69<br>6 | 6.6<br>43       | 54.<br>4 | 38.<br>7 | 19<br>40 | 32<br>8 | 0.0<br>13 | 49<br>0 | 8.8<br>3  | 0.0<br>058<br>46 | 0.2<br>02 | 0.0<br>04 | 0.0<br>006<br>46 |  | 0.3<br>65 | 0.0<br>3  | 0.0<br>001<br>04 | 0.0<br>27 | 0.3<br>44 | 0.0<br>75 | 0.0<br>08 | 1.0<br>65 | 0.0<br>018<br>05 | 0.0<br>002<br>99 | 0.0<br>14 | 0              |
| 78 | He<br>alt<br>hy   | normozo<br>ospermi<br>a  |        | 0.4<br>36 | 78.81<br>6 | 3.056 | 20.20<br>6 | 11.<br>214      | 60.<br>2 | 32.<br>7 | 22<br>87 | 33<br>2 | 0.0<br>27 | 46<br>8 | 9.8<br>52 | 0.0<br>031<br>52 | 0.1<br>72 | 0.0<br>04 | 0.0<br>006<br>55 |  | 0.4<br>01 | 0.0<br>16 | 0.0<br>003<br>52 | 0.0<br>38 | 0.8<br>62 | 0.0<br>61 | 0.0<br>12 | 1.1<br>49 | 0.0<br>020<br>77 | 0.0<br>002<br>77 | 0.0<br>13 | 0              |
| 79 | He<br>alt<br>hy   | normozo<br>ospermi<br>a  | TT     | 0.0<br>97 | 21.36<br>7 | 1.019 | 27.33<br>7 | 1.6<br>43       | 54.<br>2 | 33.<br>6 | 17<br>54 | 34<br>2 | 0.0<br>15 | 51<br>4 | 7.8<br>13 | 0.0<br>031<br>45 | 0.1<br>9  | 0.0<br>04 | 0.0<br>005<br>46 |  | 0.3<br>16 | 0.0<br>28 | 0.0<br>001<br>62 | 0.0<br>16 | 0.9<br>09 | 0.0<br>59 | 0.0<br>1  | 1.1<br>48 | 0.0<br>021<br>96 | 0.0<br>002<br>52 | 0.0<br>14 | 0              |
| 80 | He<br>alt<br>hy   | normozo<br>ospermi<br>a  | TT     | 0.3<br>43 | 10.59<br>6 | 5.094 | 21.22<br>4 | 242<br>.64<br>3 | 44.<br>8 | 33.<br>3 | 17<br>36 | 32<br>3 | 0.0<br>16 | 52<br>5 | 8.8<br>77 | 0.0<br>032<br>27 | 0.2<br>26 | 0.0<br>05 | 0.0<br>003<br>2  |  | 0.2<br>97 | 0.0<br>22 | 0.0<br>000<br>73 | 0.0<br>24 | 0.7<br>55 | 0.0<br>57 | 0.0<br>11 | 1.1<br>33 | 0.0<br>011<br>59 | 0.0<br>003<br>33 | 0.0<br>13 | 0              |
| 81 | He<br>alt<br>hy   | normozo<br>ospermi<br>a  | TT     | 0.5<br>13 | 7.078      | 4.584 | 21.73<br>4 | 4.5<br>3        | 54.<br>3 | 31.<br>9 | 18<br>49 | 30<br>7 | 0.0<br>21 | 46<br>7 | 7.6<br>89 | 0.0<br>074<br>54 | 0.2<br>16 | 0.0<br>02 | 0.0<br>006<br>08 |  | 0.3<br>2  | 0.0<br>35 | 0.0<br>000<br>44 | 0.0<br>37 | 0.6<br>77 | 0.0<br>58 | 0.0<br>12 | 1.2<br>45 | 0.0<br>021<br>96 | 0.0<br>002<br>12 | 0.0<br>09 | 0              |
| 82 | He<br>alt<br>hy   | normozo<br>ospermi<br>a  |        | 0.3<br>77 | 22.54      | 4.584 | 21.22<br>4 | 2.3<br>57       | 47.<br>1 | 41       | 18<br>87 | 39<br>2 | 0.0<br>37 | 53<br>3 | 8.6<br>69 | 0.2<br>699<br>66 | 0.2<br>08 | 0.0<br>16 | 0.0<br>074<br>14 |  | 0.2<br>74 | 0.0<br>4  | 0.0<br>001<br>46 | 0.0<br>46 | 0.5<br>52 | 0.0<br>67 | 0.2<br>39 | 1.1<br>79 | 0.0<br>020<br>12 | 0.0<br>002<br>95 | 0.0<br>12 | 0              |
| 82 | He<br>alt<br>hy   | normozo<br>ospermi<br>a  |        |           |            |       |            |                 | 54.<br>3 | 33.<br>2 | 19<br>08 | 34<br>0 | 0.0<br>17 | 50<br>3 | 9.3<br>13 | 0.0<br>055<br>7  | 0.1<br>78 | 0.0<br>04 | 0.0<br>003<br>29 |  | 0.3<br>28 | 0.0<br>22 | 0.0<br>002<br>24 | 0.0<br>21 | 0.8<br>19 | 0.0<br>57 | 0.0<br>09 | 1.1<br>43 | 0.0<br>014<br>62 | 0.0<br>003<br>04 | 0.0<br>11 | 0              |
| 83 | Inf<br>erti<br>le | asthenoz<br>osperm<br>ia |        | 0.8<br>87 | 4.074      | 4.584 | 19.18<br>7 | 0.9<br>29       | 58.<br>2 | 32.<br>7 | 20<br>06 | 29<br>0 | 0.0<br>16 | 41<br>5 | 7.5<br>31 | 0.0<br>051<br>39 | 0.2<br>03 | 0.0<br>04 | 0.0<br>005<br>06 |  | 0.3<br>25 | 0.0<br>25 | 0.0<br>000<br>58 | 0.0<br>2  | 0.4<br>92 | 0.0<br>6  | 0.0<br>08 | 1.1<br>64 | 0.0<br>020<br>84 | 0.0<br>002<br>29 | 0.0<br>13 | 0.0<br>01<br>7 |
| 84 | Inf<br>erti<br>le | Combin<br>ed             |        | 0.4<br>08 | 3.561      | 2.038 | 19.18<br>7 | 76.<br>214      | 46.<br>9 | 36       | 17<br>52 | 34<br>1 | 0.0<br>22 | 54<br>0 | 9.2<br>52 | 0.0<br>033<br>77 | 0.2<br>25 | 0.0<br>04 | 0.0<br>015<br>74 |  | 0.2<br>79 | 0.0<br>23 | 0.0<br>000<br>89 | 0.0<br>27 | 0.7<br>6  | 0.0<br>8  | 0.0<br>12 | 1.1<br>39 | 0.0<br>027<br>23 | 0.0<br>004<br>56 | 0.0<br>17 | 0.0<br>01<br>8 |
| 85 | He<br>alt<br>hy   | normozo<br>ospermi<br>a  |        | 0.6<br>15 | 5.173      | 5.094 | 20.20<br>6 | 3.0<br>71       | 53.<br>9 | 38.<br>1 | 17<br>94 | 35<br>1 | 0.0<br>18 | 52<br>4 | 9.3<br>78 | 0.0<br>036<br>85 | 0.2<br>53 | 0.0<br>03 | 0.0<br>004<br>45 |  | 0.3<br>04 | 0.0<br>19 | 0.0<br>001<br>32 | 0.0<br>2  | 0.6<br>31 | 0.0<br>66 | 0.0<br>15 | 1.0<br>1  | 0.0<br>020<br>12 | 0.0<br>003<br>36 | 0.0<br>14 | 0.0<br>01<br>8 |
| 86 | Inf               | cryptozo                 |        |           |            |       |            |                 | 51.      | 37.      | 17       | 34      | 0.0       | 52      | 9.9       | 0.0              | 0.1       | 0.0       | 0.0              |  | 0.3       | 0.0       | 0.0              | 0.0       | 0.8       | 0.0       | 0.0       | 1.1       | 0.0              | 0.0              | 0.0       | 0.0            |

|     |                   |                         |        |           |            |       |            |                 |          |           |          |         |           |         |                |                  |           |           |                  |           |           |           |                  |           |           |           |           |                  |                  |                  |           |           |
|-----|-------------------|-------------------------|--------|-----------|------------|-------|------------|-----------------|----------|-----------|----------|---------|-----------|---------|----------------|------------------|-----------|-----------|------------------|-----------|-----------|-----------|------------------|-----------|-----------|-----------|-----------|------------------|------------------|------------------|-----------|-----------|
|     | erti<br>le        | ospermi<br>a            |        |           |            |       |            | 7               | 9        | 91        | 4        | 12      | 1         | 19      | 027<br>66      | 76               | 04        | 005<br>28 |                  | 45        | 2         | 001<br>19 | 33               | 35        | 62        | 1         | 11        | 021<br>14        | 003<br>47        | 13               | 01<br>8   |           |
| 87  | He<br>alt<br>hy   | normozo<br>ospermi<br>a |        | 0.6<br>53 | 13.45<br>3 | 6.622 | 24.28<br>1 | 7.3<br>57       | 58.<br>5 | 34.<br>7  | 19<br>29 | 37<br>7 | 0.0<br>16 | 53<br>7 | 10.<br>02<br>5 | 0.0<br>073<br>24 | 0.2<br>16 | 0.0<br>05 | 0.0<br>006<br>73 |           | 0.3<br>52 | 0.0<br>24 | 0.0<br>001<br>6  | 0.0<br>62 | 0.7<br>82 | 0.0<br>63 | 0.0<br>36 | 1.1<br>88        | 0.0<br>027<br>14 | 0.0<br>005<br>67 | 0.0<br>14 | 0         |
| 88  | He<br>alt<br>hy   | normozo<br>ospermi<br>a |        | 0.5<br>59 | 2.462      | 9.678 | 51.61<br>8 | 126<br>.92<br>9 | 45.<br>1 | 35.<br>2  | 16<br>50 | 32<br>3 | 0.0<br>18 | 52<br>9 | 8.9<br>24      | 0.0<br>046<br>11 | 0.1<br>85 | 0.0<br>04 | 0.0<br>004<br>86 |           | 0.3<br>18 | 0.0<br>23 | 0.0<br>000<br>59 | 0.0<br>19 | 0.7<br>07 | 0.0<br>61 | 0.0<br>08 | 1.0<br>54        | 0.0<br>022<br>2  | 0.0<br>003<br>01 | 0.0<br>16 | 0         |
| 89  | Inf<br>erti<br>le | azoosper<br>mia         | TT     | 1.0<br>35 | 26.35      | 3.566 | 17.14<br>9 | 138<br>.35<br>7 | 59.<br>2 | 33.<br>4  | 21<br>05 | 32<br>5 | 0.0<br>21 | 34<br>1 | 7.1<br>35      | 0.0<br>037<br>46 | 0.2<br>1  | 0.0<br>04 | 0.0<br>002<br>27 |           | 0.2<br>92 | 0.0<br>15 | 0.0<br>001<br>46 | 0.0<br>24 | 0.6<br>34 | 0.0<br>58 | 0.0<br>08 | 1.2<br>21        | 0.0<br>016<br>96 | 0.0<br>015<br>41 | 0.0<br>14 | 0         |
| 90  | Inf<br>erti<br>le | OAT                     | TT     | 0.1<br>76 | 37.85<br>4 | 1.528 | 17.65<br>9 | 6.6<br>43       | 62.<br>4 |           | 19<br>98 | 32<br>2 | 0.0<br>17 | 45<br>7 | 8.1<br>64      | 0.0<br>038<br>34 | 0.1<br>79 | 0.0<br>04 | 0.0<br>003<br>89 |           | 0.3<br>21 | 0.0<br>17 | 0.0<br>001<br>17 | 0.0<br>23 | 0.7<br>29 | 0.0<br>56 | 0.0<br>09 | 1.1<br>72        | 0.0<br>023<br>86 | 0.0<br>002<br>14 | 0.0<br>13 | 0         |
| 91  | Inf<br>erti<br>le | OAT                     | TT     | 0.6<br>92 | 66.28<br>5 | 2.547 | 19.18<br>7 | 2.3<br>57       | 59.<br>4 | 35.<br>3  | 17<br>65 | 31<br>6 | 0.0<br>24 | 52<br>9 | 9.1<br>3       | 0.0<br>023<br>2  | 0.1<br>65 | 0.0<br>05 | 0.0<br>004<br>26 |           | 0.3<br>05 | 0.0<br>17 | 0.0<br>000<br>44 | 0.0<br>19 | 0.8<br>25 | 0.0<br>77 | 0.0<br>11 | 1.0<br>79        | 0.0<br>028<br>33 | 0.0<br>003<br>89 | 0.0<br>12 | 0         |
| 92  | Inf<br>erti<br>le | necrozo<br>ospermi<br>a | TT     | 0.4<br>64 | 41.66<br>5 | 3.056 | 22.75<br>2 | 16.<br>929      | 48.<br>7 | 37.<br>6  | 18<br>80 | 35<br>6 | 0.0<br>18 | 50<br>0 | 8.4<br>53      | 0.0<br>033<br>78 | 0.1<br>98 | 0.0<br>04 | 0.0<br>002<br>63 |           | 0.3<br>25 | 0.0<br>23 | 0.0<br>001<br>5  | 0.0<br>23 | 0.6<br>71 | 0.0<br>64 | 0.0<br>08 | 1.0<br>61        | 0.0<br>016<br>77 | 0.0<br>004<br>55 | 0.0<br>13 | 0         |
| 93  | He<br>alt<br>hy   | normozo<br>ospermi<br>a | C<br>C | 0.6<br>84 | 26.57      | 4.075 | 23.26<br>2 | 38.<br>357      |          | 32.<br>56 | 20<br>61 | 29<br>9 | 0.0<br>21 | 44<br>3 | 7.7<br>4       | 0.0<br>028<br>77 | 0.2<br>08 | 0.0<br>04 | 0.0<br>007<br>62 |           | 0.3<br>47 | 0.0<br>25 | 0.0<br>000<br>96 | 0.0<br>33 | 0.7<br>85 | 0.0<br>8  | 0.0<br>08 | 1.1<br>09        | 0.0<br>014<br>84 | 0.0<br>002<br>51 | 0.0<br>14 | 0         |
| 94  | He<br>alt<br>hy   | normozo<br>ospermi<br>a | C<br>C | 0.7<br>34 | 45.98<br>8 | 6.113 | 18.67<br>7 | 1.8<br>06       |          | 33.<br>59 | 22<br>39 | 33<br>0 | 0.0<br>16 | 50<br>7 | 9.3<br>27      | 0.0<br>031<br>45 | 0.2<br>44 | 0.0<br>04 | 0.0<br>004<br>33 |           | 0.3<br>3  | 0.0<br>2  | 0.0<br>001<br>21 | 0.0<br>3  | 0.7<br>73 | 0.0<br>66 | 0.0<br>12 | 1.1<br>07        | 0.0<br>017<br>76 | 0.0<br>002<br>63 | 0.0<br>15 | 0         |
| 95  | Inf<br>erti<br>le | azoosper<br>mia         | TT     | 0.6<br>15 | 70.20<br>7 | 6.622 | 19.18<br>7 | 3.9<br>35       | 63.<br>1 | 31.<br>7  | 20<br>42 | 33<br>1 | 0.0<br>21 | 42<br>0 | 7.8<br>64      | 0.0<br>051<br>18 | 0.1<br>56 | 0.0<br>04 | 0.0<br>018<br>74 |           | 0.3<br>45 | 0.0<br>25 | 0.0<br>001<br>49 | 0.0<br>74 | 0.9<br>17 | 0.0<br>65 | 0.0<br>12 | 1.0<br>93        | 0.0<br>019<br>69 | 0.0<br>006<br>67 | 0.0<br>14 | 0         |
| 96  | He<br>alt<br>hy   | normozo<br>ospermi<br>a | TT     | 0.1<br>24 | 28.98<br>7 | 0.509 | 19.69<br>6 |                 | 45.<br>6 | 41.<br>7  | 17<br>30 | 43<br>0 | 0.0<br>19 | 70<br>2 | 10.<br>76      | 0.0<br>041<br>49 | 0.2<br>04 | 0.0<br>05 | 0.0<br>004<br>43 |           | 0.3<br>38 | 0.0<br>22 | 0.0<br>001<br>48 | 0.0<br>32 | 1.1<br>17 | 0.0<br>75 | 0.0<br>09 | 1.1<br>15        | 0.0<br>020<br>76 | 0.0<br>009<br>7  | 0.0<br>16 | 0.0<br>02 |
| 97  | He<br>alt<br>hy   | normozo<br>ospermi<br>a | TT     | 0.9<br>19 | 23.51<br>5 | 3.566 | 19.18<br>7 | 2.7<br>31       | 54.<br>5 | 36.<br>7  | 19<br>22 | 36<br>3 | 0.0<br>3  | 55<br>9 | 8.8<br>15      | 0.0<br>027<br>57 | 0.1<br>66 | 0.0<br>05 | 0.0<br>004<br>3  | 0.0<br>01 | 0.3<br>2  | 0.0<br>22 | 0.0<br>000<br>75 | 0.0<br>3  | 0.8<br>28 | 0.0<br>6  | 0.0<br>1  | 1.0<br>51        | 0.0<br>019<br>22 | 0.0<br>000<br>87 | 0.0<br>16 | 0         |
| 98  | Inf<br>erti<br>le | oligozoo<br>spermia     | TT     |           |            | 2.038 |            | 46.<br>714      | 53.<br>2 | 38.<br>7  | 18<br>92 | 35<br>9 | 0.0<br>18 | 53<br>8 | 8.1<br>49      | 0.0<br>031<br>57 | 0.1<br>93 | 0.0<br>04 | 0.0<br>020<br>68 |           | 0.3<br>07 | 0.0<br>2  | 0.0<br>001<br>37 | 0.0<br>85 | 0.7<br>67 | 0.0<br>25 | 1.1<br>79 | 0.0<br>017<br>19 | 0.0<br>016<br>05 | 0.0<br>13        | 0         |           |
| 99  | Inf<br>erti<br>le | OAT                     | C<br>C | 0.5<br>65 | 23.80<br>6 | 2.547 | 17.65<br>9 | 42.<br>429      | 43.<br>1 | 34.<br>6  | 17<br>10 | 33<br>4 | 0.0<br>14 | 55<br>8 | 9.6<br>52      | 0.0<br>039<br>68 | 0.1<br>64 | 0.0<br>04 | 0.0<br>019<br>82 |           | 0.2<br>83 | 0.0<br>19 | 0.0<br>000<br>99 | 0.0<br>2  | 0.2<br>89 | 0.0<br>76 | 0.0<br>1  | 1.0<br>63        | 0.0<br>017<br>02 | 0.0<br>003<br>12 | 0.0<br>12 | 0         |
| 100 | Inf               | azoosper                |        | 0.2       | 37.89      | 1.019 | 32.43      | 3.7             | 50.      | 32.       | 19       | 34      | 0.0       | 48      | 8.9            | 0.0              | 0.2       | 0.0       | 0.0              | 0         | 0.3       | 0.0       | 0.0              | 0.0       | 0.5       | 0.0       | 0.0       | 1.0              | 0.0              | 0.0              | 0.0       | 0         |

|     |                       |                      |        |           |            |            |            |            |          |          |          |         |           |         |                |                  |           |           |                  |           |           |           |                  |           |           |           |           |           |                  |                  |           |                |
|-----|-----------------------|----------------------|--------|-----------|------------|------------|------------|------------|----------|----------|----------|---------|-----------|---------|----------------|------------------|-----------|-----------|------------------|-----------|-----------|-----------|------------------|-----------|-----------|-----------|-----------|-----------|------------------|------------------|-----------|----------------|
|     | er<br>ti<br>le        | mia                  |        | 22        | 5          |            | 1          | 5          | 5        | 8        | 02       | 0       | 2         | 8       | 91             | 017<br>83        | 06        | 05        | 005<br>17        |           | 01        | 24        | 001<br>45        | 2         | 19        | 62        | 25        | 61        | 021<br>15        | 001<br>91        | 13        |                |
| 101 | Inf<br>er<br>ti<br>le | oligozo<br>ospermia  | C<br>C | 0.4<br>02 | 36.85      | 6.113      | 17.14<br>9 | 3.0<br>09  | 56.<br>2 | 36.<br>5 | 20<br>39 | 31<br>7 | 0.0<br>13 | 44<br>2 | 8.2<br>76      | 0.0<br>088<br>06 | 0.1<br>83 | 0.0<br>03 | 0.0<br>024<br>74 |           | 0.3<br>32 | 0.0<br>22 | 0.0<br>001<br>02 | 0.0<br>27 | 0.5<br>37 | 0.0<br>74 | 0.0<br>06 | 0.9<br>96 | 0.0<br>021<br>65 | 0.0<br>002<br>3  | 0.0<br>12 | 0              |
| 102 | Inf<br>er<br>ti<br>le | Combin<br>ed         | TT     | 0.3<br>23 | 36.78<br>9 | 8.15       | 24.28<br>1 | 3.3<br>8   | 50.<br>7 | 38.<br>6 | 18<br>96 | 36<br>4 | 0.0<br>17 | 57<br>0 | 11.<br>28      | 0.0<br>049<br>79 | 0.1<br>74 | 0.0<br>03 | 0.0<br>038<br>54 |           | 0.3<br>21 | 0.0<br>21 | 0.0<br>001<br>32 | 0.0<br>12 | 0.6<br>96 | 0.0<br>78 | 0.0<br>13 | 1.2<br>04 | 0.0<br>025<br>42 | 0.0<br>002<br>94 | 0.0<br>16 | 0              |
| 104 | Inf<br>er<br>ti<br>le | Combin<br>ed         |        | 0.2<br>58 | 46.74<br>4 | 3.566      | 25.29<br>9 | 1.8<br>06  | 44.<br>3 | 36.<br>4 | 14<br>79 | 35<br>6 | 0.0<br>19 | 66<br>0 | 10.<br>07<br>4 | 0.0<br>038<br>87 | 0.1<br>93 | 0.0<br>05 | 0.0<br>023<br>56 |           | 0.2<br>98 | 0.0<br>18 | 0.0<br>001<br>29 | 0.0<br>24 | 0.5<br>94 | 0.0<br>64 | 0.0<br>08 | 0.9<br>58 | 0.0<br>013<br>21 | 0.0<br>006<br>85 | 0.0<br>12 | 0.0<br>01<br>7 |
| 105 | He<br>alt<br>hy       | normozo<br>ospermia  |        | 0.6<br>86 | 40.04<br>9 | 8.66       | 0.17       | 10.<br>417 | 60.<br>3 |          | 20<br>81 | 34<br>0 | 0.0<br>15 | 47<br>9 | 8.7<br>3       | 0.0<br>045<br>46 | 0.2<br>26 | 0.0<br>03 | 0.0<br>003<br>29 |           | 0.4<br>4  | 0.0<br>22 | 0.0<br>001<br>83 | 0.0<br>59 | 0.5<br>81 | 0.0<br>77 | 0.0<br>07 | 1.0<br>75 | 0.0<br>022<br>49 | 0.0<br>004<br>62 | 0.0<br>13 | 0              |
| 107 | Inf<br>er<br>ti<br>le | Combin<br>ed         |        | 0.4<br>02 | 39.64<br>1 | 22.24<br>2 | 18.50<br>8 | 6.1<br>57  | 55.<br>2 | 41.<br>9 | 18<br>42 | 38<br>7 | 0.0<br>18 | 61<br>2 | 8.7<br>04      | 0.0<br>050<br>14 | 0.2<br>13 | 0.0<br>04 | 0.0<br>003<br>73 |           | 0.3<br>63 | 0.0<br>24 | 0.0<br>001<br>69 | 0.0<br>25 | 0.7<br>11 | 0.0<br>76 | 0.0<br>2  | 1.1<br>17 | 0.0<br>015<br>96 | 0.0<br>019<br>45 | 0.0<br>13 | 0              |
| 108 | Inf<br>er<br>ti<br>le | Combin<br>ed         |        | 0.3<br>37 | 44.00<br>8 | 4.755      | 31.92<br>1 | 6.1<br>57  | 46.<br>6 | 37.<br>1 | 18<br>06 | 36<br>3 | 0.0<br>15 | 57<br>0 | 8.6<br>63      | 0.0<br>053<br>15 | 0.1<br>75 | 0.0<br>05 | 0.0<br>002<br>62 |           | 0.2<br>95 | 0.0<br>19 | 0.0<br>001<br>36 | 0.0<br>22 | 0.5<br>69 | 0.0<br>81 | 0.0<br>07 | 1.0<br>49 | 0.0<br>021<br>68 | 0.0<br>060<br>57 | 0.0<br>15 | 0              |
| 109 | Inf<br>er<br>ti<br>le | asthenoz<br>ospermia |        | 0.0<br>3  | 41.50<br>4 | 8.321      | 19.18<br>7 | 9.1<br>2   | 50.<br>5 | 38.<br>2 | 18<br>32 | 37<br>1 | 0.0<br>23 | 54<br>3 | 8.0<br>99      | 0.0<br>037<br>97 | 0.2<br>41 | 0.0<br>04 | 0.0<br>007<br>08 |           | 0.3<br>2  | 0.0<br>21 | 0.0<br>001<br>23 | 0.0<br>18 | 0.6<br>76 | 0.0<br>64 | 0.0<br>1  | 1.1<br>18 | 0.0<br>028<br>14 | 0.0<br>002<br>66 | 0.0<br>12 | 0              |
| 110 | Inf<br>er<br>ti<br>le | OAT                  |        | 0.7<br>12 | 20.89<br>5 | 11.37<br>7 | 20.20<br>6 | 1.9<br>91  | 52.<br>6 | 34.<br>8 | 19<br>81 | 33<br>9 | 0.0<br>22 | 55<br>6 | 8.3<br>93      | 0.0<br>054<br>04 | 0.1<br>37 | 0.0<br>02 | 0.0<br>026<br>99 | 0.0<br>01 | 0.3<br>17 | 0.0<br>22 | 0.0<br>001<br>35 | 0.0<br>39 | 0.7<br>01 | 0.0<br>62 | 0.0<br>14 | 1.2<br>05 | 0.0<br>017<br>63 | 0.0<br>002<br>82 | 0.0<br>12 | 0              |
| 111 | He<br>alt<br>hy       | normozo<br>ospermia  |        | 0.6<br>22 | 15.30<br>6 | 11.88<br>6 | 13.07<br>4 | 1.3<br>43  | 55.<br>9 | 40.<br>1 | 18<br>82 | 34<br>9 | 0.0<br>19 | 59<br>6 | 7.0<br>14      | 0.0<br>039<br>21 | 0.1<br>9  | 0.0<br>03 | 0.0<br>023<br>05 |           | 0.3<br>17 | 0.0<br>27 | 0.0<br>001<br>39 | 0.0<br>19 | 0.6<br>71 | 0.0<br>55 | 0.0<br>07 | 1.0<br>2  | 0.0<br>029<br>18 | 0.0<br>005<br>31 | 0.0<br>11 | 0.0<br>01<br>8 |
| 112 | Inf<br>er<br>ti<br>le | Combin<br>ed         | TT     | 0.9<br>82 | 20.66<br>2 | 11.88<br>6 | 15.62<br>1 | 2.2<br>69  | 52.<br>6 | 38.<br>2 | 19<br>70 | 33<br>3 | 0.0<br>16 | 55<br>3 | 8.5<br>16      | 0.0<br>043<br>66 | 0.2<br>28 | 0.0<br>04 | 0.0<br>030<br>32 |           | 0.3<br>18 | 0.0<br>16 | 0.0<br>001<br>05 | 0.0<br>14 | 0.4<br>39 | 0.0<br>56 | 0.0<br>09 | 1.0<br>37 | 0.0<br>022<br>59 | 0.0<br>003<br>06 | 0.0<br>1  | 0              |
| 113 | He<br>alt<br>hy       | normozo<br>ospermia  |        | 0.7<br>06 | 23.16<br>5 | 11.37<br>7 | 10.35<br>7 | 4.4<br>91  | 51.<br>1 | 35.<br>6 | 18<br>62 | 33<br>3 | 0.0<br>16 | 51<br>1 | 7.4<br>37      | 0.0<br>050<br>69 | 0.2<br>36 | 0.0<br>03 | 0.0<br>019<br>3  |           | 0.2<br>83 | 0.0<br>21 | 0.0<br>000<br>89 | 0.0<br>35 | 0.7<br>46 | 0.0<br>59 | 0.0<br>08 | 1.1<br>1  | 0.0<br>016<br>23 | 0.0<br>003<br>89 | 0.0<br>11 | 0.0<br>01<br>8 |
| 114 | He<br>alt<br>hy       | normozo<br>ospermia  | TT     | 0.7<br>39 | 34.16<br>9 | 10.86<br>8 | 14.43<br>3 | 0.6<br>94  | 45.<br>4 | 38.<br>9 | 16<br>55 | 36<br>4 | 0.0<br>26 | 60<br>5 | 9.0<br>52      | 0.0<br>039<br>46 | 0.2<br>09 | 0.0<br>03 | 0.0<br>003<br>31 |           | 0.3<br>02 | 0.0<br>19 | 0.0<br>002<br>28 | 0.0<br>22 | 0.5<br>54 | 0.0<br>57 | 0.0<br>07 | 1.1<br>15 | 0.0<br>017<br>56 | 0.0<br>003<br>08 | 0.0<br>11 | 0              |
| 115 | He<br>alt<br>hy       | normozo<br>ospermia  | C<br>C | 0.7<br>28 | 92.79<br>6 | 11.37<br>7 | 19.01<br>7 | 3.2<br>87  | 47.<br>2 | 35.<br>8 | 18<br>69 | 32<br>3 | 0.0<br>22 | 57<br>4 | 8.6<br>08      | 0.0<br>042<br>91 | 0.2<br>05 | 0.0<br>03 | 0.0<br>024<br>93 |           | 0.3<br>15 | 0.0<br>39 | 0.0<br>001<br>36 | 0.0<br>21 | 0.5<br>16 | 0.0<br>66 | 0.0<br>09 | 1.0<br>55 | 0.0<br>014<br>71 | 0.0<br>003<br>75 | 0.0<br>09 | 0              |
| 116 | He                    | normozo              | TT     | 0.6       | 12.68      | 11.88      | 16.47      | 4.8        | 51.      | 34.      | 19       | 31      | 0.0       | 49      | 9.4            | 0.0              | 0.1       | 0.0       | 0.0              | 0         | 0.3       | 0.0       | 0.0              | 0.0       | 0.5       | 0.0       | 0.0       | 1.0       | 0.0              | 0.0              | 0.0       | 0              |



|     |                   |                                   |        |           |            |            |            |           |          |          |          |         |           |         |                |                  |           |           |                  |           |           |           |                  |           |           |           |           |           |                  |                  |           |                |
|-----|-------------------|-----------------------------------|--------|-----------|------------|------------|------------|-----------|----------|----------|----------|---------|-----------|---------|----------------|------------------|-----------|-----------|------------------|-----------|-----------|-----------|------------------|-----------|-----------|-----------|-----------|-----------|------------------|------------------|-----------|----------------|
|     | alt<br>hy         | ospermi<br>a                      |        | 61        | 6          | 6          |            | 61        | 2        | 1        | 92       | 3       | 21        | 2       | 04             | 032<br>86        | 89        | 05        | 005<br>46        |           | 42        | 3         | 001<br>33        | 21        | 25        | 57        | 09        | 9         | 014<br>26        | 002<br>75        | 09        |                |
| 117 | Inf<br>erti<br>le | <b>asthenoz<br/>osperm<br/>ia</b> | TT     | 0.6<br>13 | 26.30<br>9 | 10.86<br>8 | 1.868      | 4.9<br>54 | 51.<br>4 | 35.<br>1 | 19<br>83 | 33<br>7 | 0.0<br>21 | 54<br>1 | 9.3<br>07      | 0.0<br>039<br>73 | 0.2<br>08 | 0.0<br>03 | 0.0<br>004<br>42 | 0         | 0.3<br>56 | 0.1<br>18 | 0.0<br>000<br>73 | 0.0<br>2  | 0.9<br>86 | 0.0<br>62 | 0.0<br>08 | 1.0<br>07 | 0.0<br>019<br>19 | 0.0<br>003<br>58 | 0.0<br>1  | 0              |
| 119 | Inf<br>erti<br>le | <b>oligozoo<br/>spermia</b>       | C<br>C | 0.2<br>76 | 23.45<br>7 | 10.35<br>8 | 12.90<br>4 | 0.6<br>94 | 53.<br>8 | 34.<br>7 | 19<br>63 | 33<br>9 | 0.0<br>14 | 52<br>2 | 7.1<br>89      | 0.0<br>031<br>17 | 0.2<br>19 | 0.0<br>03 | 0.0<br>022       | 0         | 0.3<br>62 | 0.0<br>24 | 0.0<br>001<br>2  | 0.0<br>14 | 0.5<br>89 | 0.0<br>54 | 0.0<br>08 | 1.0<br>56 | 0.0<br>014<br>07 | 0.0<br>002<br>82 | 0.0<br>1  | 0.0<br>01<br>8 |
| 120 | Inf<br>erti<br>le | <b>oligozoo<br/>spermia</b>       | C<br>C | 0.5<br>73 | 13.85      | 12.39<br>6 | 13.92<br>3 | 1.8<br>06 | 53.<br>6 | 36.<br>1 | 17<br>83 | 33<br>2 | 0.0<br>16 | 56<br>3 | 9.7<br>67      | 0.0<br>032<br>13 | 0.1<br>94 | 0.0<br>05 | 0.0<br>026<br>28 | 0.0<br>01 | 0.3<br>44 | 0.0<br>36 | 0.0<br>002<br>08 | 0.0<br>2  | 1.0<br>35 | 0.0<br>53 | 0.0<br>08 | 0.9<br>69 | 0.0<br>016<br>97 | 0.0<br>007<br>48 | 0.0<br>11 | 0              |
| 121 | Inf<br>erti<br>le | <b>Combin<br/>ed</b>              | C<br>C | 0.4<br>36 | 30.09<br>3 | 10.86<br>8 | 24.11<br>1 | 1.6<br>2  | 58.<br>3 | 36.<br>5 | 17<br>97 | 35<br>8 | 0.0<br>16 | 55<br>1 | 8.3<br>28      | 0.0<br>035<br>24 | 0.1<br>91 | 0.0<br>04 | 0.0<br>017<br>6  | 0         | 0.3<br>93 | 0.0<br>26 | 0.0<br>000<br>76 | 0.0<br>27 | 0.7<br>98 | 0.0<br>46 | 0.0<br>07 | 1.1<br>06 | 0.0<br>016<br>89 | 0.0<br>029<br>19 | 0.0<br>12 | 0              |
| 122 | Inf<br>erti<br>le | <b>Combin<br/>ed</b>              | TT     | 0.3<br>31 | 35.39<br>1 | 4.755      | 17.99<br>8 | 5.8<br>8  | 58.<br>2 | 34.<br>1 | 17<br>35 | 30<br>8 | 0.0<br>2  | 50<br>0 | 8.6<br>36      | 0.0<br>065<br>28 | 0.1<br>89 | 0.0<br>03 | 0.0<br>005<br>08 | 0         | 0.3<br>59 | 0.0<br>29 | 0.0<br>002<br>33 | 0.0<br>28 | 0.8<br>13 | 0.0<br>48 | 0.0<br>32 | 1.0<br>57 | 0.0<br>027<br>09 | 0.0<br>002<br>73 | 0.0<br>1  | 0.0<br>03<br>3 |
| 123 | Inf<br>erti<br>le | <b>Combin<br/>ed</b>              | TT     | 1.0<br>2  | 145.9<br>5 | 11.37<br>7 | 3.735      | 2.9<br>17 |          |          |          |         |           |         |                |                  |           |           |                  |           |           |           |                  |           |           |           |           |           |                  |                  |           |                |
| 124 | Inf<br>erti<br>le | <b>asthenoz<br/>osperm<br/>ia</b> |        | 0.7<br>84 | 44.93<br>9 | 9.849      | 6.282      | 1.6<br>2  |          |          |          |         |           |         |                |                  |           |           |                  |           |           |           |                  |           |           |           |           |           |                  |                  |           |                |
| 125 | Inf<br>erti<br>le | <b>azoosper<br/>mia</b>           |        | 0.5<br>95 | 19.96<br>3 | 5.774      | 8.32       | 3.7<br>5  |          |          |          |         |           |         |                |                  |           |           |                  |           |           |           |                  |           |           |           |           |           |                  |                  |           |                |
| 126 | Inf<br>erti<br>le | <b>Combin<br/>ed</b>              |        | 0.5<br>47 | 24.91<br>2 | 11.37<br>7 | 7.301      | 3.0<br>09 |          |          |          |         |           |         |                |                  |           |           |                  |           |           |           |                  |           |           |           |           |           |                  |                  |           |                |
| 127 | He<br>alt<br>hy   | normozo<br>ospermi<br>a           |        | 0.8<br>77 | 5.467      | 12.39<br>6 | 2.717      | 1.1<br>57 | 60.<br>5 | 33.<br>7 | 19<br>17 | 31<br>3 | 0.0<br>18 | 46<br>8 | 8.8<br>83      | 0.0<br>064<br>67 | 0.2<br>21 | 0.0<br>04 | 0.0<br>003<br>55 | 0         | 0.4<br>48 | 0.0<br>4  | 0.0<br>002<br>25 | 0.0<br>31 | 0.8<br>52 | 0.0<br>46 | 0.0<br>07 | 0.9<br>55 | 0.0<br>030<br>5  | 0.0<br>003<br>22 | 0.0<br>11 | 0              |
| 129 | He<br>alt<br>hy   | normozo<br>ospermi<br>a           |        | 0.8<br>7  | 16.17<br>9 | 11.37<br>7 | 10.35<br>7 | 6.2<br>5  |          |          |          |         |           |         |                |                  |           |           |                  |           |           |           |                  |           |           |           |           |           |                  |                  |           |                |
| 130 | Inf<br>erti<br>le | <b>Combin<br/>ed</b>              | C<br>C | 0.6<br>81 | 17.46      | 11.88<br>6 | 14.43<br>3 | 4.7<br>69 | 54.<br>8 | 37.<br>7 | 18<br>92 | 32<br>7 | 0.0<br>13 | 52<br>6 | 12.<br>26<br>4 | 0.0<br>054<br>71 | 0.2<br>32 | 0.0<br>04 | 0.0<br>043<br>38 | 0         | 0.3<br>45 | 0.0<br>26 | 0.0<br>002<br>23 | 0.0<br>23 | 0.8<br>65 | 0.0<br>51 | 0.0<br>07 | 0.9<br>94 | 0.0<br>031<br>58 | 0.0<br>006<br>45 | 0.0<br>13 | 0              |
| 131 | He<br>alt<br>hy   | normozo<br>ospermi<br>a           | TT     | 0.3<br>96 | 25.90<br>2 | 6.793      | 1.698      | 2.2<br>69 | 58.<br>1 | 34.<br>3 | 19<br>45 | 31<br>8 | 0.0<br>2  | 49<br>0 | 8.3<br>98      | 0.0<br>056<br>76 | 0.1<br>21 | 0.0<br>04 | 0.0<br>018<br>52 | 0         | 0.4<br>89 | 0.0<br>18 | 0.0<br>000<br>91 | 0.0<br>28 | 1.2<br>75 | 0.0<br>47 | 0.0<br>42 | 1.0<br>04 | 0.0<br>015<br>44 | 0.0<br>003<br>72 | 0.0<br>11 | 0.0<br>01<br>7 |
| 132 | He                | normozo                           | TT     | 0.9       | 96.11      | 9.34       | 9.339      | 15.       | 52.      | 36.      | 18       | 31      | 0.0       | 52      | 9.1            | 0.0              | 0.2       | 0.0       | 0.0              | 0         | 0.3       | 0.0       | 0.0              | 0.0       | 1.3       | 0.0       | 0.0       | 1.0       | 0.0              | 0.0              | 0.0       | 0              |

|     |                   |                                   |        |           |            |            |            |            |          |          |          |         |           |         |           |                  |           |           |                  |           |           |           |                  |           |           |           |           |           |                  |                  |           |                |
|-----|-------------------|-----------------------------------|--------|-----------|------------|------------|------------|------------|----------|----------|----------|---------|-----------|---------|-----------|------------------|-----------|-----------|------------------|-----------|-----------|-----------|------------------|-----------|-----------|-----------|-----------|-----------|------------------|------------------|-----------|----------------|
|     | alt<br>hy         | ospermi<br>a                      |        | 38        | 4          |            |            | 093        | 5        | 7        | 20       | 0       | 18        | 7       | 23        | 033<br>41        |           | 04        | 004<br>57        |           | 74        | 34        | 001<br>5         | 22        | 15        | 46        | 07        | 71        | 014<br>69        | 003<br>23        | 1         |                |
| 133 | Inf<br>erti<br>le | <b>Combin<br/>ed</b>              |        | 0.7<br>17 | 23.16<br>5 | 8.83       | 10.35<br>7 | 1.5<br>28  | 50.<br>6 | 37.<br>9 | 16<br>53 | 35<br>6 | 0.0<br>22 | 55<br>5 | 8.2<br>5  | 0.0<br>046<br>38 | 0.1<br>89 | 0.0<br>04 | 0.0<br>005<br>91 |           | 0.3<br>92 | 0.0<br>21 | 0.0<br>001<br>67 | 0.0<br>34 | 0.8<br>12 | 0.0<br>44 | 0.0<br>07 | 0.9<br>91 | 0.0<br>031<br>61 | 0.0<br>004<br>17 | 0.0<br>12 | 0              |
| 135 | Inf<br>erti<br>le | <b>OAT</b>                        | C<br>C | 0.9<br>04 | 16.52<br>8 | 10.35<br>8 | 2.717      | 0.6<br>02  | 59.<br>7 |          | 19<br>11 | 33<br>4 | 0.0<br>19 | 55<br>1 | 7.8<br>46 | 0.0<br>052<br>03 | 0.1<br>89 | 0.0<br>05 | 0.0<br>006<br>26 | 0.0<br>01 | 0.3<br>33 | 0.0<br>26 | 0.0<br>001<br>34 | 0.0<br>47 | 0.9<br>7  | 0.0<br>46 | 0.0<br>11 | 1.0<br>18 | 0.0<br>020<br>17 | 0.0<br>006<br>83 | 0.0<br>12 | 0              |
| 136 | Inf<br>erti<br>le | <b>OAT</b>                        |        | 0.7<br>06 | 17.75<br>1 | 11.88<br>6 | 9.848      | 1.6<br>2   | 50.<br>2 | 35.<br>3 | 16<br>52 | 38<br>9 | 0.0<br>19 | 56<br>7 | 9.6<br>47 | 0.0<br>027<br>23 | 0.2<br>14 | 0.0<br>03 | 0.0<br>034       |           | 0.2<br>97 | 0.0<br>18 | 0.0<br>001<br>47 | 0.0<br>45 | 2.6<br>57 | 0.0<br>48 | 0.0<br>09 | 1.0<br>3  | 0.0<br>015<br>74 | 0.0<br>004<br>21 | 0.0<br>12 | 0              |
| 137 | Inf<br>erti<br>le | <b>asthenoz<br/>osperm<br/>ia</b> | C<br>C | 0.3<br>06 | 36.84<br>7 | 10.86<br>8 | 7.811      |            |          | 39.<br>8 | 16<br>04 | 37<br>9 | 0.0<br>16 | 60<br>9 | 6.1<br>2  | 0.0<br>041<br>73 | 0.1<br>87 | 0.0<br>03 | 0.0<br>004<br>7  |           | 0.3<br>06 | 0.0<br>21 | 0.0<br>000<br>91 | 0.0<br>17 | 0.9<br>9  | 0.0<br>3  | 0.0<br>26 | 0.9<br>28 | 0.0<br>015<br>99 | 0.0<br>020<br>62 | 0.0<br>13 | 0              |
| 138 | Inf<br>erti<br>le | <b>OAT</b>                        | TT     | 0.6<br>13 | 26.01<br>8 | 10.86<br>8 | 4.754      | 0.7<br>87  | 51.<br>4 | 33.<br>1 | 16<br>85 | 34<br>2 | 0.0<br>16 | 57<br>6 | 8.3<br>86 | 0.0<br>034<br>29 | 0.2<br>19 | 0.0<br>04 | 0.0<br>016<br>6  |           | 0.3<br>8  | 0.0<br>24 | 0.0<br>002<br>08 | 0.0<br>22 | 1.2<br>56 | 0.0<br>78 | 0.0<br>06 | 1.0<br>06 | 0.0<br>019<br>36 | 0.0<br>003<br>45 | 0.0<br>13 | 0.0<br>01<br>7 |
| 139 | Inf<br>erti<br>le | <b>Combin<br/>ed</b>              | TT     | 0.7<br>12 | 32.07<br>3 | 12.39<br>6 | 5.264      | 1.4<br>35  | 56.<br>6 | 36.<br>7 | 18<br>40 | 34<br>0 | 0.0<br>25 | 55<br>6 | 7.4<br>71 | 0.0<br>033<br>45 | 0.2<br>05 | 0.0<br>04 | 0.0<br>011<br>45 |           | 0.3<br>51 | 0.0<br>18 | 0.0<br>000<br>75 | 0.0<br>25 | 1.0<br>39 | 0.0<br>32 | 0.0<br>31 | 1.0<br>13 | 0.0<br>015<br>01 | 0.0<br>003<br>02 | 0.0<br>12 | 0.0<br>01<br>8 |
| 140 | He<br>alt<br>hy   | normozo<br>ospermi<br>a           | TT     | 0.6<br>65 | 20.60<br>4 | 11.37<br>7 | 14.43<br>3 | 15.<br>231 | 56.<br>6 | 37.<br>3 | 18<br>90 | 33<br>7 | 0.0<br>22 | 51<br>4 | 8.4<br>6  | 0.0<br>042<br>77 | 0.1<br>79 | 0.0<br>05 | 0.0<br>022<br>56 |           | 0.3<br>66 | 0.0<br>29 | 0.0<br>001<br>45 | 0.0<br>22 | 1.0<br>9  | 0.0<br>49 | 0.0<br>19 | 1.0<br>01 | 0.0<br>014<br>58 | 0.0<br>002<br>74 | 0.0<br>11 | 0              |
| 144 | He<br>alt<br>hy   | normozo<br>ospermi<br>a           | TT     | 0.7<br>01 | 63.51<br>1 | 10.86<br>8 | 14.43<br>3 | 1.1<br>57  | 42.<br>3 | 36.<br>4 | 18<br>53 | 33<br>2 | 0.0<br>21 | 52<br>3 | 9.0<br>62 | 0.0<br>031       | 0.1<br>8  | 0.0<br>03 | 0.0<br>026<br>26 |           | 0.3<br>5  | 0.0<br>32 | 0.0<br>002<br>56 | 0.0<br>22 | 1.2<br>99 | 0.0<br>28 | 0.0<br>08 | 0.9<br>21 | 0.0<br>023<br>26 | 0.0<br>004<br>13 | 0.0<br>15 | 0              |
| 145 | Inf<br>erti<br>le | <b>azoosper<br/>mia</b>           | TT     | 0.6<br>96 | 19.14<br>8 | 0.848      | 4.245      | 2.0<br>83  | 71.<br>9 | 34.<br>7 | 22<br>03 | 33<br>9 | 0.0<br>16 | 42<br>8 | 8.6<br>34 | 0.0<br>248<br>33 | 0.1<br>39 | 0.0<br>04 | 0.0<br>019<br>62 |           | 0.3<br>8  | 0.0<br>16 | 0.0<br>001<br>21 | 0.0<br>35 | 1.0<br>57 | 0.0<br>26 | 0.0<br>22 | 1.0<br>06 | 0.0<br>020<br>02 | 0.0<br>002<br>91 | 0.0<br>16 | 0              |
| 146 | Inf<br>erti<br>le | <b>asthenoz<br/>osperm<br/>ia</b> |        | 0.6<br>41 | 89.53<br>5 |            | 13.41<br>4 | 1.7<br>13  | 58.<br>4 | 43.<br>9 | 17<br>77 | 40<br>5 | 0.0<br>2  | 54<br>5 | 8.3<br>18 | 0.0<br>037<br>9  | 0.1<br>82 | 0.0<br>02 | 0.0<br>024<br>03 |           | 0.3<br>94 | 0.0<br>21 | 0.0<br>001<br>53 | 0.0<br>22 | 1.0<br>1  | 0.0<br>27 | 0.0<br>07 | 0.8<br>66 | 0.0<br>016<br>86 | 0.0<br>004<br>01 | 0.0<br>14 | 0              |
| 147 | Inf<br>erti<br>le | <b>polyzoo<br/>spermia</b>        | C<br>C | 0.8<br>77 | 64.32<br>6 | 8.321      | 3.226      | 2.6<br>39  | 58.<br>2 | 35.<br>2 | 20<br>79 | 34<br>3 | 0.0<br>18 | 54<br>8 | 8.5<br>56 | 0.0<br>031<br>25 | 0.2<br>04 | 0.0<br>04 | 0.0<br>022<br>12 |           | 0.3<br>65 | 0.0<br>16 | 0.0<br>001<br>56 | 0.0<br>23 | 0.9<br>99 | 0.0<br>25 | 0.0<br>08 | 0.9<br>19 | 0.0<br>017<br>11 | 0.0<br>002       | 0.0<br>16 | 0              |
| 148 | Inf<br>erti<br>le | <b>azoosper<br/>mia</b>           | TT     | 1.7<br>88 | 64.50<br>1 | 9.849      | 14.94<br>2 | 1.7<br>13  | 64.<br>7 | 36.<br>4 | 21<br>51 | 35<br>4 | 0.0<br>25 | 42<br>7 | 7.3<br>33 | 0.0<br>068<br>87 | 0.1<br>86 | 0.0<br>01 | 0.0<br>015<br>07 |           | 0.3<br>46 | 0.0<br>23 | 0.0<br>001<br>35 | 0.0<br>31 | 1.0<br>8  | 0.0<br>37 | 0.0<br>54 | 0.9<br>77 | 0.0<br>031<br>36 | 0.0<br>004<br>17 | 0.0<br>18 | 0              |
| 150 | He<br>alt<br>hy   | normozo<br>ospermi<br>a           | TT     | 0.5<br>03 | 86.39<br>1 | 11.88<br>6 | 11.88<br>6 | 8.4<br>26  | 56.<br>6 | 39.<br>1 | 16<br>48 | 37<br>9 | 0.0<br>19 | 61<br>6 | 9.4<br>61 | 0.0<br>036<br>03 | 0.2<br>21 | 0.0<br>03 | 0.0<br>005<br>65 |           | 0.3<br>37 | 0.0<br>27 | 0.0<br>000<br>74 | 0.0<br>34 | 1.0<br>71 | 0.0<br>26 | 0.0<br>09 | 0.9<br>6  | 0.0<br>020<br>88 | 0.0<br>005<br>93 | 0.0<br>13 | 0              |
| 151 | Inf               | <b>OAT</b>                        | TT     | 0.5       | 9.193      | 6.283      | 16.97      | 7.0        | 47       | 41.      | 16       | 41      | 0.0       | 67      | 9.1       | 0.0              | 0.1       | 0.0       | 0.0              | 0         | 0.3       | 0.0       | 0.0              | 0.0       | 0.9       | 0.0       | 0.0       | 0.9       | 0.0              | 0.0              | 0.0       | 0              |

|     |                   |                          |        |           |             |            |            |           |           |          |          |          |           |          |                |                  |           |           |                  |   |           |           |                  |           |           |           |           |           |                  |                  |           |          |
|-----|-------------------|--------------------------|--------|-----------|-------------|------------|------------|-----------|-----------|----------|----------|----------|-----------|----------|----------------|------------------|-----------|-----------|------------------|---|-----------|-----------|------------------|-----------|-----------|-----------|-----------|-----------|------------------|------------------|-----------|----------|
|     | erti<br>le        |                          |        | 95        |             |            | 9          | 83        |           | 1        | 47       | 4        | 28        | 5        | 07             | 041<br>59        | 57        | 02        | 005<br>59        |   | 46        | 31        | 000<br>6         | 13        | 98        | 29        | 27        | 22        | 021<br>47        | 004<br>14        | 13        |          |
| 152 | He<br>alt<br>hy   | normozo<br>spermi<br>a   | TT     | 0.9<br>52 | 70.55<br>6  | 10.35<br>8 | 12.90<br>4 | 1.2<br>5  | 54.<br>7  | 36.<br>3 | 18<br>05 | 37<br>4  | 0.0<br>24 | 54<br>5  | 10.<br>37<br>8 | 0.0<br>042<br>37 | 0.1<br>9  | 0.0<br>04 | 0.0<br>012<br>51 |   | 0.3<br>76 | 0.0<br>24 | 0.0<br>000<br>61 | 0.0<br>32 | 1.1<br>46 | 0.0<br>28 | 0.0<br>35 | 1.0<br>33 | 0.0<br>025<br>47 | 0.0<br>004<br>91 | 0.0<br>14 | 0        |
| 153 | He<br>alt<br>hy   | normozo<br>spermi<br>a   | TT     | 0.4<br>47 | 53.49<br>8  | 6.283      | 9.339      | 2.8<br>24 | 35.<br>65 | 18<br>7  | 32<br>79 | 0.0<br>8 | 47<br>14  | 9.3<br>5 | 0.0<br>26      | 0.0<br>047<br>54 | 0.1<br>6  | 0.0<br>03 | 0.0<br>003<br>28 |   | 0.3<br>43 | 0.0<br>28 | 0.0<br>001<br>64 | 0.0<br>27 | 0.9<br>86 | 0.0<br>24 | 0.0<br>09 | 0.8<br>91 | 0.0<br>018<br>52 | 0.0<br>003<br>69 | 0.0<br>12 | 0        |
| 154 | Inf<br>erti<br>le | oligozoo<br>spermia      | TT     | 0.4<br>19 | 29.45<br>3  | 6.283      | 14.94<br>2 | 2.0<br>83 | 57.<br>1  | 35       | 18<br>04 | 30<br>8  | 0.0<br>29 | 52<br>6  | 8.1<br>81      | 0.0<br>030<br>56 | 0.1<br>74 | 0.0<br>03 | 0.0<br>026<br>74 |   | 0.3<br>18 | 0.0<br>33 | 0.0<br>001<br>92 | 0.0<br>24 | 1.1<br>53 | 0.0<br>26 | 0.0<br>16 | 0.9<br>02 | 0.0<br>027<br>34 | 0.0<br>002<br>34 | 0.0<br>14 | 0        |
| 155 | He<br>alt<br>hy   | normozo<br>spermi<br>a   | C<br>C | 0.8<br>2  | 10.35<br>7  | 11.88<br>6 | 11.88<br>6 | 2.1<br>76 | 51        | 34.<br>6 | 18<br>27 | 32<br>4  | 0.0<br>17 | 54<br>1  | 7.9<br>71      | 0.0<br>048<br>68 | 0.1<br>81 | 0.0<br>03 | 0.0<br>003<br>6  |   | 0.3<br>46 | 0.0<br>25 | 0.0<br>001<br>06 | 0.0<br>23 | 1.0<br>14 | 0.0<br>28 | 0.0<br>17 | 0.8<br>95 | 0.0<br>012<br>5  | 0.0<br>008<br>79 | 0.0<br>14 | 0        |
| 156 | Inf<br>erti<br>le | Combin<br>ed             | TT     | 0.8<br>26 | 19.61<br>4  | 8.83       | 10.86<br>7 | 2.8<br>24 | 64.<br>4  | 41.<br>7 | 18<br>76 | 35<br>5  | 0.0<br>22 | 55<br>0  | 9.2<br>3       | 0.0<br>034<br>68 | 0.2<br>32 | 0.0<br>04 | 0.0<br>004<br>86 |   | 0.3<br>91 | 0.0<br>28 | 0.0<br>001<br>62 | 0.0<br>24 | 1.2<br>65 | 0.0<br>55 | 0.0<br>13 | 1.0<br>88 | 0.0<br>040<br>1  | 0.0<br>003<br>61 | 0.0<br>14 | 0        |
| 158 | Inf<br>erti<br>le | cryptozo<br>spermi<br>a  | TT     | 0.2<br>17 | 92.44<br>6  | 10.86<br>8 | 4.754      | 3.8<br>43 | 61.<br>6  | 34.<br>6 | 18<br>56 | 36<br>5  | 0.0<br>2  | 52<br>8  | 8.1<br>33      | 0.0<br>034<br>27 | 0.1<br>76 | 0.0<br>03 | 0.0<br>004<br>15 |   | 0.3<br>35 | 0.0<br>2  | 0.0<br>001<br>18 | 0.0<br>24 | 1.0<br>74 | 0.0<br>24 | 0.0<br>07 | 0.8<br>71 | 0.0<br>018<br>08 | 0.0<br>005<br>12 | 0.0<br>13 | 0        |
| 159 | Inf<br>erti<br>le | Combin<br>ed             |        | 0.8<br>38 | 116.8<br>98 | 11.88<br>6 | 11.37<br>6 | 2.6<br>39 |           |          |          |          |           |          |                |                  |           |           |                  |   |           |           |                  |           |           |           |           |           |                  |                  |           |          |
| 160 | Inf<br>erti<br>le | Combin<br>ed             |        | 0.2<br>19 | 98.61<br>7  | 9.849      | 6.282      | 6.8<br>98 | 49.<br>7  | 31       | 17<br>60 | 33<br>4  | 0.0<br>21 | 53<br>9  | 8.2<br>45      | 0.0<br>034<br>96 | 0.1<br>82 | 0.0<br>03 | 0.0<br>017<br>78 |   | 0.3<br>53 | 0.0<br>31 | 0.0<br>001<br>44 | 0.0<br>2  | 1.3<br>99 | 0.0<br>6  | 0.0<br>1  | 0.9<br>83 | 0.0<br>016<br>83 | 0.0<br>003<br>7  | 0.0<br>13 | 0        |
| 162 | Inf<br>erti<br>le | OAT                      | TT     |           |             |            |            |           | 51.<br>1  | 36.<br>4 | 20<br>49 | 36<br>9  | 0.0<br>22 | 51<br>1  | 7.8<br>08      | 0.0<br>026<br>13 | 0.2<br>2  | 0.0<br>04 | 0.0<br>020<br>88 |   | 0.3<br>9  | 0.0<br>27 | 0.0<br>001<br>19 | 0.0<br>23 | 1.1<br>81 | 0.0<br>54 | 0.0<br>12 | 1.0<br>16 | 0.0<br>016<br>52 | 0.0<br>005<br>27 | 0.0<br>12 | 0        |
| 163 | He<br>alt<br>hy   | normozo<br>spermi<br>a   | TT     |           |             |            |            |           | 58.<br>7  | 37.<br>6 | 20<br>37 | 35<br>2  | 0.0<br>24 | 56<br>7  | 10.<br>7       | 0.0<br>034<br>64 | 0.2<br>11 | 0.0<br>03 | 0.0<br>027<br>14 |   | 0.3<br>88 | 0.0<br>43 | 0.0<br>001<br>4  | 0.0<br>31 | 1.2<br>84 | 0.5<br>86 | 0.0<br>14 | 1.1<br>09 | 0.0<br>019<br>92 | 0.0<br>002<br>92 | 0.0<br>12 | 0        |
| 164 | Inf<br>erti<br>le | asthenoz<br>osperm<br>ia |        |           |             |            |            |           | 75.<br>1  | 36.<br>7 | 20<br>68 | 30<br>4  | 0.0<br>28 | 50<br>5  | 8.8<br>75      | 0.0<br>032<br>14 | 0.2<br>05 | 0.0<br>05 | 0.0<br>004<br>25 |   | 0.4<br>19 | 0.0<br>25 | 0.0<br>001<br>04 | 0.0<br>38 | 1.4<br>41 | 0.0<br>56 | 0.0<br>15 | 0.9<br>48 | 0.0<br>022       | 0.0<br>002<br>17 | 0.0<br>14 | 0        |
| 165 | He<br>alt<br>hy   | normozo<br>spermi<br>a   | TT     | 0.6<br>32 | 49.71<br>3  | 0.68       | 10.86<br>7 | 2.9<br>17 | 53        | 33.<br>9 | 19<br>78 | 35<br>7  | 0.0<br>16 | 55<br>4  | 8.9<br>42      | 0.0<br>044<br>17 | 0.2<br>08 | 0.0<br>04 | 0.0<br>021<br>37 |   | 0.3<br>52 | 0.0<br>82 | 0.0<br>001<br>52 | 0.0<br>25 | 1.2<br>61 | 0.0<br>52 | 0.0<br>09 | 1.0<br>26 | 0.0<br>024<br>44 | 0.0<br>003<br>99 | 0.0<br>14 | 0        |
| 166 | Inf<br>erti<br>le | asthenoz<br>osperm<br>ia | TT     | 0.8<br>38 | 31.84       | 4.755      | 2.717      | 1.8<br>06 | 57        | 39.<br>2 | 18<br>81 | 33<br>7  | 0.0<br>25 | 59<br>7  | 9.5<br>94      | 0.0<br>033<br>95 | 0.1<br>98 | 0.0<br>04 | 0.0<br>024<br>07 |   | 0.4<br>31 | 0.0<br>16 | 0.0<br>000<br>3  | 0.0<br>73 | 1.6<br>03 | 0.0<br>56 | 0.0<br>12 | 1.0<br>61 | 0.0<br>017<br>63 | 0.0<br>003<br>93 | 0.0<br>11 | 0.0<br>8 |
| 167 | Inf               | Combin                   | C      | 0.4       | 48.43       | 9.849      | 12.39      | 2.0       | 52.       | 40       | 17       | 33       | 0.0       | 53       | 8.3            | 0.0              | 0.2       | 0.0       | 0.0              | 0 | 0.3       | 0.0       | 0.0              | 0.0       | 1.3       | 0.0       | 0.0       | 0.8       | 0.0              | 0.0              | 0.0       | 0        |

|     |                       |                          |        |           |             |            |            |           |           |           |          |         |           |         |                |                  |           |           |                  |           |           |           |                  |           |           |           |           |           |                  |                  |           |   |
|-----|-----------------------|--------------------------|--------|-----------|-------------|------------|------------|-----------|-----------|-----------|----------|---------|-----------|---------|----------------|------------------|-----------|-----------|------------------|-----------|-----------|-----------|------------------|-----------|-----------|-----------|-----------|-----------|------------------|------------------|-----------|---|
|     | er<br>ti<br>le        | ed                       | C      | 99        | 3           |            | 5          | 83        | 8         |           | 79       | 9       | 18        | 8       | 79             | 035<br>69        | 21        | 04        | 021<br>62        |           | 57        | 21        | 001<br>5         | 29        | 39        | 52        | 18        | 9         | 014<br>24        | 004<br>81        | 15        |   |
| 168 | Inf<br>er<br>ti<br>le | azoosper<br>mia          |        | 0.3<br>61 | 27.93<br>9  | 10.35<br>8 | 12.39<br>5 | 2.3<br>61 | 60.<br>6  | 40.<br>7  | 18<br>25 | 36<br>5 | 0.0<br>22 | 55<br>5 | 9.2<br>63      | 0.0<br>062<br>74 | 0.2<br>07 | 0.0<br>05 | 0.0<br>006<br>3  | 0.0<br>01 | 0.3<br>78 | 0.0<br>29 | 0.0<br>000<br>6  | 0.0<br>52 | 1.2<br>45 | 0.0<br>48 | 0.0<br>11 | 1.0<br>6  | 0.0<br>016<br>88 | 0.0<br>016<br>21 | 0.0<br>12 | 0 |
| 169 | He<br>alt<br>hy       | normozo<br>spermi<br>a   | C<br>C | 0.6<br>65 | 126.4<br>46 | 10.86<br>8 | 8.829      | 3.2<br>87 |           | 36.<br>61 | 17<br>64 | 32<br>1 | 0.0<br>17 | 53<br>2 | 8.0<br>32      | 0.0<br>059<br>64 | 0.1<br>95 | 0.0<br>04 | 0.0<br>024<br>66 |           | 0.3<br>2  | 0.0<br>23 | 0.0<br>002<br>01 | 0.0<br>17 | 1.4<br>19 | 0.0<br>51 | 0.0<br>18 | 0.9<br>81 | 0.0<br>026<br>15 | 0.0<br>004<br>05 | 0.0<br>1  | 0 |
| 170 | Inf<br>er<br>ti<br>le | cryptozo<br>ospermi<br>a |        | 0.7<br>44 | 17.51<br>8  | 8.321      | 10.86<br>7 | 1.3<br>43 | 61.<br>4  | 39.<br>3  | 19<br>59 | 36<br>8 | 0.0<br>18 | 59<br>7 | 7.5<br>69      | 0.0<br>063<br>82 | 0.1<br>85 | 0.0<br>02 | 0.0<br>003<br>65 |           | 0.3<br>58 | 0.0<br>28 | 0.0<br>001<br>24 | 0.0<br>22 | 1.3<br>36 | 0.0<br>77 | 0.0<br>09 | 0.9<br>8  | 0.0<br>019<br>01 | 0.0<br>022<br>76 | 0.0<br>1  | 0 |
| 171 | He<br>alt<br>hy       | normozo<br>spermi<br>a   | TT     | 0.3<br>43 | 39.81<br>6  | 7.811      | 0.679      | 2.1<br>76 | 62.<br>1  | 38.<br>2  | 17<br>37 | 35<br>6 | 0.0<br>18 | 53<br>6 | 8.7<br>38      | 0.0<br>06        | 0.2<br>22 | 0.0<br>03 | 0.0<br>004<br>88 |           | 0.3<br>82 | 0.0<br>23 | 0.0<br>001<br>35 | 0.0<br>2  | 1.0<br>04 | 0.0<br>49 | 0.0<br>1  | 0.9<br>36 | 0.0<br>029<br>18 | 0.0<br>003<br>71 | 0.0<br>13 | 0 |
| 173 | Inf<br>er<br>ti<br>le | asthenoz<br>osperm<br>ia |        |           |             |            |            |           |           |           |          |         |           |         |                |                  |           |           |                  |           |           |           |                  |           |           |           |           |           |                  |                  |           |   |
| 174 | He<br>alt<br>hy       | normozo<br>spermi<br>a   | C<br>C | 0.8<br>57 | 80.80<br>2  | 5.264      | 9.339      | 3.2<br>87 |           | 40.<br>3  | 19<br>14 | 36<br>4 | 0.0<br>21 | 60<br>9 | 10.<br>31<br>7 | 0.0<br>055<br>14 | 0.2<br>32 | 0.0<br>03 | 0.0<br>025<br>6  |           | 0.4<br>18 | 0.0<br>2  | 0.0<br>001<br>95 | 0.0<br>19 | 1.1<br>33 | 0.0<br>51 | 0.0<br>1  | 0.9<br>59 | 0.0<br>030<br>11 | 0.0<br>004<br>78 | 0.0<br>11 | 0 |
| 175 | Inf<br>er<br>ti<br>le | Combin<br>ed             | C<br>C | 0.5<br>6  | 23.51<br>5  | 3.227      | 11.37<br>6 | 1.1<br>57 | 57.<br>4  | 40.<br>1  | 17<br>39 | 36<br>3 | 0.0<br>22 | 56<br>3 | 7.1<br>28      | 0.0<br>054<br>28 | 0.1<br>97 | 0.0<br>03 | 0.0<br>025<br>01 |           | 0.4<br>07 | 0.0<br>15 | 0.0<br>001<br>96 | 0.0<br>24 | 1.0<br>24 | 0.0<br>5  | 0.0<br>12 | 0.9<br>64 | 0.0<br>055<br>53 | 0.0<br>029<br>27 | 0.0<br>12 | 0 |
| 176 | He<br>alt<br>hy       | normozo<br>spermi<br>a   |        | 0.7<br>84 | 15.88<br>8  | 8.321      | 4.415      | 2.5<br>46 | 11<br>6.8 | 31.<br>7  | 18<br>15 | 28<br>1 | 0.1<br>05 | 44<br>1 | 20.<br>17<br>5 | 0.0<br>124<br>77 | 1.4<br>19 | 0.0<br>4  | 0.0<br>154<br>21 | 0.0<br>01 | 1.1<br>62 | 0.1<br>11 | 0.0<br>009<br>27 | 0.0<br>81 | 7.3<br>93 | 0.5<br>21 | 0.0<br>96 | 9.7<br>64 | 0.0<br>137<br>2  | 0.0<br>027<br>49 | 0.0<br>94 | 0 |
| 177 | Inf<br>er<br>ti<br>le | Combin<br>ed             |        | 0.4<br>99 | 33.76<br>1  | 11.37<br>7 | 2.717      | 2.8<br>24 | 51.<br>7  | 35.<br>2  | 18<br>27 | 34<br>2 | 0.0<br>24 | 55<br>1 | 9.0<br>37      | 0.0<br>051<br>29 | 0.2<br>16 | 0.0<br>04 | 0.0<br>005<br>27 |           | 0.4<br>32 | 0.0<br>55 | 0.0<br>000<br>45 | 0.0<br>32 | 1.2<br>29 | 0.0<br>47 | 0.0<br>09 | 0.8<br>87 | 0.0<br>019<br>4  | 0.0<br>007       | 0.0<br>13 | 0 |
| 178 | Inf<br>er<br>ti<br>le | polyzoo<br>spermia       | TT     | 0.2<br>51 | 26.95       | 9.34       | 3.735      | 2.4<br>54 | 52.<br>1  | 36.<br>1  | 16<br>98 | 34<br>3 | 0.0<br>18 | 56<br>9 | 9.2<br>67      | 0.0<br>041<br>62 | 0.2<br>15 | 0.0<br>03 | 0.0<br>025<br>02 |           | 0.3<br>99 | 0.0<br>31 | 0.0<br>000<br>6  | 0.0<br>2  | 1.1<br>11 | 0.0<br>46 | 0.0<br>1  | 0.8<br>23 | 0.0<br>050<br>68 | 0.0<br>003<br>28 | 0.0<br>17 | 0 |
| 179 | He<br>alt<br>hy       | normozo<br>spermi<br>a   | TT     | 0.2<br>63 | 41.50<br>4  | 4.246      | 1.698      | 3.0<br>09 |           | 37.<br>5  | 20<br>30 | 33<br>8 | 0.0<br>35 | 51<br>0 | 9.8<br>74      | 0.0<br>049<br>65 | 0.2<br>1  | 0.0<br>03 | 0.0<br>032<br>08 |           | 0.4<br>61 | 0.0<br>17 | 0.0<br>001<br>63 | 0.0<br>2  | 1.4<br>45 | 0.0<br>5  | 0.0<br>37 | 0.8<br>54 | 0.0<br>019<br>16 | 0.0<br>002<br>59 | 0.0<br>13 | 0 |
